1 **Seasonal Dynamics in the Number and Composition of Coliform**  
2 **Bacteria in Drinking Water Reservoirs**

3 Carolin Reitter<sup>a</sup>, Heike Petzoldt<sup>b</sup>, Andreas Korth<sup>b</sup>, Felix Schwab<sup>a</sup>, Claudia Stange<sup>a</sup>, Beate  
4 Hambsch<sup>a</sup>, Andreas Tiehm<sup>a</sup>, Ilias Lagkouravdos<sup>c</sup>, Johannes Gescher<sup>d,e</sup>, Michael Hügler<sup>a\*</sup>

5

6 <sup>a</sup> TZW: DVGW-Technologiezentrum Wasser (German Water Center), Karlsruher Str. 84,  
7 76139, Karlsruhe, Germany

8 <sup>b</sup> TZW: DVGW-Technologiezentrum Wasser (German Water Center), Wasserwerkstr. 2.  
9 01326, Dresden, Germany

10 <sup>c</sup> ZIEL - Institute for Food & Health, Technical University of Munich, Freising, Germany.

11 <sup>d</sup> Department of Applied Biology, Institute for Applied Biosciences, Karlsruhe Institute of  
12 Technology (KIT), Fritz-Haber-Weg 2, 76131, Karlsruhe, Germany.

13 <sup>e</sup> Institute for Biological Interfaces, Biomolecular Micro- and Nanostructures, Karlsruhe Institute  
14 of Technology, Eggenstein-Leopoldshafen, Germany

15

16 \* Corresponding author. E-Mail address: [michael.huegler@tzw.de](mailto:michael.huegler@tzw.de) (M. Hügler)

## 17 **Abstract**

18 Worldwide, surface waters like lakes and reservoirs are one of the major sources for drinking  
19 water production, especially in regions with water scarcity. In the last decades, they have  
20 undergone significant changes due to climate change. This includes not only an increase of  
21 the water temperature but also microbiological changes. In recent years, increased numbers  
22 of coliform bacteria have been observed in these surface waters. In our monitoring study we  
23 analyzed two drinking water reservoirs (Klingenberg and Kleine Kinzig Reservoir) over a two-  
24 year period in 2018 and 2019. We detected high numbers of coliform bacteria up to  $2.4 \times 10^4$   
25 bacteria per 100 ml during summer months, representing an increase of four orders of  
26 magnitude compared to winter. Diversity decreased to one or two species that dominated the  
27 entire water body, namely *Enterobacter asburiae* and *Lelliottia* spp., depending on the  
28 reservoir. Interestingly, the same, very closely related strains have been found in several  
29 reservoirs from different regions. Fecal indicator bacteria *Escherichia coli* and enterococci  
30 could only be detected in low concentrations. Furthermore, fecal marker genes were not  
31 detected in the reservoir, indicating that high concentrations of coliform bacteria were not due  
32 to fecal contamination. Microbial community revealed *Frankiales* and *Burkholderiales* as  
33 dominant orders. *Enterobacterales*, however, only had a frequency of 0.04% within the  
34 microbial community, which is not significantly affected by the extreme change in coliform  
35 bacteria number. Redundancy analysis revealed water temperature, oxygen as well as  
36 nutrients and metals (phosphate, manganese) as factors affecting the dominant species. We  
37 conclude that this sudden increase of coliform bacteria is an autochthonic process that can be  
38 considered as a mass proliferation or “coliform bloom” within the reservoir. It is correlated to  
39 higher water temperatures in summer and is therefore expected to occur more frequently in  
40 the near future, challenging drinking water production.

## 41 **Keywords**

42 coliform bacteria; drinking water reservoir; mass proliferation; climate change; *Enterobacter*;  
43 *Lelliottia*

## 44 **1. Introduction**

45 Worldwide, surface water is a major source for drinking water production, estimated to cover  
46 approx. 50% of the worldwide need (WHO, 2016). Reservoirs or dams are built to store surface  
47 water to guarantee the availability of water for drinking water production, especially in regions  
48 with water scarcity. In the following, we refer to such dams and reservoirs used for the  
49 production of drinking water as “drinking water reservoirs”. In Germany about 12% of drinking  
50 water supply is covered by the use of surface water from lakes and reservoir waterworks  
51 (Statistisches Bundesamt, 2018). Regionally, this proportion is much higher, like e.g. in Saxony  
52 and Thuringia with about 50%.

53 Reservoirs are created by damming a river in a valley, usually with a pre-reservoir to withhold  
54 the coarsest dirt. From a limnologic point of view, reservoirs can be regarded as a mixture of  
55 lake and river. The closer to the dam, the more lacustrine the reservoir gets. In comparison to  
56 many lakes, the water retention time is considerably shorter. Generally, stratification is  
57 observed in summer. Temperature uniformity on the one hand and wind on the other hand  
58 ensure a mixing in spring and autumn. In winter, inverse stratification can occur. Stratification  
59 influences the distribution of substances in the reservoir, as mixing of water bodies no longer  
60 occurs. As a consequence oxygen consumption in the hypolimnion can lead to the solution of  
61 metals (e.g. manganese) and nutrients from the sediment.

62 Within the last decades, reservoirs have undergone significant changes due to climate change.  
63 One of the main factors is the temperature. In lakes, water temperature has increased around  
64 0.1 to 1.5 °C in the last 40 years (Bates et al., 2008). Even the cold hypolimnetic water shows  
65 an increase in temperature of about 0.1 to 0.2 °C per decade (Dokulil et al., 2006).  
66 Temperature influences many physicochemical parameters and globally leads to an increase  
67 in pH and a decrease of dissolved gases like oxygen in deeper layers (Bates et al., 2008;  
68 Delpla et al., 2009). Furthermore, due to global warming, the stratification period in lakes in the  
69 Northern Hemisphere has lengthened by 2 to 3 weeks and thermal stability has increased

70 (Bates et al., 2008) due to an earlier warming-up of the water and a decreased ice coverage  
71 in winter (Magnuson et al., 2000).

72 Unlike groundwater, that is protected by overlying soils, surface waters are vulnerable to  
73 various contaminations and often show microbial fecal contamination that impacts drinking  
74 water production or recreational activities. Rivers and streams are widely used as receiving  
75 waters for wastewater treatment plant effluents, and rivers, as well as lakes and reservoirs,  
76 are influenced by diffuse pollution like e.g. agricultural runoffs (Kirschner et al., 2017;  
77 Kistemann et al., 2002). Fecal pollution poses potential health risks to humans, therefore  
78 microbiological monitoring is essential in assessing the water quality of reservoirs used for  
79 drinking water production (Kistemann et al., 2002; Paruch et al., 2019).

80 The hygienic-microbiological water quality of drinking water, raw water for drinking water  
81 production and recreational water is examined using bacterial indicators such as coliform  
82 bacteria, *Escherichia coli* (*E. coli*) and enterococci (European Community, 1998). Especially  
83 the detection of the latter two indicates a possible fecal contamination. This is a serious health  
84 issue as it indicates the potential presence of pathogens. For coliform bacteria, this concept  
85 has been relativized as this heterogeneous group of *Enterobacteriaceae* also occurs in the  
86 environment, like e.g. water, plants and soil, thus their hygienic relevance is still under debate  
87 (Ashbolt et al., 2001; Leclerc et al., 2001; Octavia and Lan, 2014; Stevens et al., 2003; WHO,  
88 2017).

89 In order to be able to operate reservoir water treatment in a natural, stable and economical  
90 way, it is necessary to provide raw water, which means the water used for drinking water  
91 production, with the lowest possible chemical and microbiological contamination. For this  
92 purpose, appropriate protection and management concepts for the catchment areas and raw  
93 water resources are in place. Despite the implementation of the proven management concepts,  
94 changes in the raw water quality occur, which pose considerable challenges for the treatment  
95 process.

96 In recent years, high densities of coliform bacteria have repeatedly been observed in drinking  
97 water reservoirs and lakes (Davis et al., 2005; Exner et al., 2005; Freier et al., 2005; Packroff  
98 and Clasen, 2005). The observed high concentrations of coliform bacteria (occasionally above  
99  $10^4$  per 100 ml) led to uncertainty for water suppliers and represented a challenge for drinking  
100 water treatment. Water works treating reservoir water often rely on classical treatment  
101 technologies like flocculation and filtration and final disinfection with chlorine or chlorine  
102 dioxide. According to the German recommendations, treated water should be free from  
103 indicator bacteria prior to final disinfection. With very high concentrations of coliform bacteria  
104 in the raw water, these requirements cannot always be fulfilled.

105 High numbers of coliform bacteria occur mainly in summer, which means at a time when high  
106 water temperatures prevail. As possible factors, besides water temperature, dissolved organic  
107 carbon (DOC) and oxygen content have been discussed (Exner et al., 2005; Freier et al., 2005;  
108 Kämpfer et al., 2008; Packroff and Clasen, 2005). In order to clarify the question of the cause  
109 of high concentrations of coliform bacteria, it is important to understand the ecology in a  
110 reservoir and the changes they have undergone in recent years due to climate change.

111 Therefore, the aim of our study was to examine the phenomenon of the “coliform blooms” in  
112 drinking water reservoirs in Germany. For this reason, microbial indicator bacteria like coliform  
113 bacteria, *E. coli* and enterococci that occur in drinking water reservoirs were quantified and  
114 afterwards identified using Matrix-assisted laser desorption ionization-time of flight mass  
115 spectrometry (MALDI-TOF MS) and Multilocus sequence analysis (MLSA). Especially *E. coli*  
116 and enterococci as fecal indicator bacteria (FIB) indicate a potential fecal contamination, which  
117 may involve a risk to public health. Microbial source tracking (MST) methods were applied in  
118 order to identify the origin of fecal contaminations. In addition, total cell counts (TCC) and the  
119 microbiome were analyzed, to view the results in context with the whole microbial community.

## 120 **2. Material and methods**

### 121 **2.1. Study side and sampling**

122 Sampling was carried out between April 2018 and December 2019 in two drinking water  
123 reservoirs in Germany (Klingenberg Reservoir in Saxony and Kleine Kinzig Reservoir in  
124 Baden-Württemberg). The main characteristics of the reservoirs are summarized in Table 1.

125 For the monitoring study, the surface water and raw water of the reservoirs was sampled on a  
126 two to four weeks basis. For Kleine Kinzig Reservoir sampling was carried out at a tower  
127 located 151 m away from the dam wall in the lake. This tower consist of seven sampling points  
128 for the measurement of the depth profile between ground level (544 m above sea level (ASL))  
129 and the surface 55 m higher (599.3 m ASL). The withdrawal height of the raw water varies  
130 according to the seasons and physical conditions. During measuring period the withdrawal  
131 height was between 20 and 30 m above ground. Only in January 2019 the withdrawal height  
132 was higher (45.3 m above ground) due to high turbidity contents in the deeper water. Surface  
133 water was sampled in the highest possible withdrawal floor, which differed due to the water  
134 level between 45.3 m to 55.3 m above ground.

135 In Klingenberg Reservoir sampling spots are directly at the dam wall and consist of six  
136 sampling steps from nearly ground level (360.2 m ASL) up to the surface with 25.3 m (385 m  
137 ASL). The extraction height of raw water was 50 cm above ground throughout the entire series  
138 of measurements. Surface water was extracted at the highest withdrawal point 25.3 m above  
139 ground. For Klingenberg Reservoir it was also possible to monitor the main inflow (Wilde  
140 Weißeritz). With these water samples microbiological analysis and identification of bacteria  
141 were conducted as described in the next section.

142 In order to answer the question for parameters that influence the variability of coliform bacteria  
143 within the reservoir, a sampling campaign was carried out at Klingenberg Reservoir in June  
144 and September 2018, during which surface water of different points in the reservoir, the depth  
145 profile and all inflows were sampled as described below. In addition, 2 L water samples were

146 collected from selected sites to investigate fecal markers as well as the microbial community.  
147 For the Kleine Kinzig Reservoir, water samples for fecal markers and microbial community  
148 were taken during sampling campaigns in July and December 2019 from the depth profile.  
149 These samples were pretreated and DNA was extracted as described below.

150 High concentrations of coliform bacteria have been observed in many drinking water reservoirs  
151 and lakes in Germany. Therefore, in addition to the two reservoirs intensively sampled in this  
152 study, coliform bacteria were also quantified and identified from other reservoirs and lakes  
153 when high densities occurred. In these cases, the responsible water suppliers provided either  
154 water samples or isolates. Those samples were treated as described later and isolates were  
155 identified using MALDI-TOF MS and MLSA (see below). The following surface waters were  
156 examined: Lake Constance, Rappbode Reservoir, Breitenbach Reservoir and Söse Reservoir.

157 Meteorological data (air temperature, precipitation, wind speed) were measured during the  
158 complete period of monitoring on a daily basis. Furthermore, physical and chemical  
159 parameters were documented according to the German regulations for water, sewage, and  
160 sludge analysis (Wasserchemische Gesellschaft and Deutsches Institut für Normung e.V.,  
161 2020). For measurement of on-site parameters (oxygen, temperature, conductivity)  
162 multiparameter probes were used (SEBA Hydrometrie GmbH & Co. KG, Kaufbeuren,  
163 Germany, at Kleine Kinzig Reservoir and Sea&Sun Technology GmbH, Trappenkamp,  
164 Germany, at Klingenberg Reservoir). For better comparison, only values from the depth profile  
165 of the reservoir were used. This was not the case for chlorophyll *a* in the Kleine Kinzig  
166 Reservoir, as this parameter was only measured in the mixed sample of the reservoir.

## 167 **2.2. Enumeration and identification of bacteria**

### 168 **2.2.1. Microbiological methods**

169 Coliform bacteria and *E. coli* were quantified in 100 ml water sample using the most probable  
170 number (MPN) method Colilert®-18/Quanti-Tray® (IDEXX Laboratories, Westbrook, USA)  
171 according to ISO 9308-2 (2012). For isolation of the coliform bacteria, the wells of the Quanti-

172 Tray<sup>®</sup> were opened with a sterile scalpel. The liquid was transferred on heterotrophic plate  
173 count agar plates (Merck KGaA, Darmstadt, Germany), recommended by German regulations  
174 (Deutsches Einheitsverfahren, DEV), with a sterile inoculation loop in order to gain a pure  
175 culture. Agar plates were incubated overnight at 36 °C. For identification 10 to 30 isolates per  
176 sample were isolated and analyzed with MALDI-TOF MS.

177 The culture-based detection of enterococci in 100 ml water sample was carried out according  
178 to ISO 7899-2 (2000). Additionally, heterotrophic plate counts (HPC) were conducted in 1 ml  
179 water sample at 22 °C and 36 °C as described in the German drinking water directive (Drinking  
180 Water Ordinance, 2001).

181 To measure total cell count (TCC), together with high (HNA) and low (LNA) nucleic acid content  
182 bacteria, flow cytometry was used (Hammes et al., 2008; Prest et al., 2013). Water samples  
183 were diluted in filtered (0.2 µm, Pall Corporation, New York, USA) nuclease-free water (gibco<sup>®</sup>  
184 life technologies<sup>™</sup>, Carlsbad, USA), incubated in the dark with SYBR-Green I (Life  
185 Technologies, Eugene, USA, 10,000x in DMSO) for 10 minutes at 37 °C and analyzed with  
186 Bio-Rad S3 Cell Sorter (Bio-Rad Laboratories Inc., California, USA) and ProSort<sup>™</sup> Software  
187 using green fluorescence as a trigger.

## 188 **2.2.2. Matrix-assisted laser desorption ionization-time of flight mass spectrometry** 189 **(MALDI-TOF MS)**

190 For the identification of bacterial isolates MALDI-TOF MS was used. Bacterial isolates were  
191 picked from DEV agar plates and transferred onto a spot of a polished steel target. Protein  
192 extraction was performed with 1 µl of 70% formic acid and then air-dried. The spots were  
193 covered with 1 µl of a saturated solution of α-cyano-4-hydroxycinnamic acid (Bruker Daltonics  
194 GmbH, Bremen, Germany) solved in 50% acetonitrile and 2.5% trifluoroacetic acid and again  
195 air-dried. The plate was applied to the Microflex LT (Bruker Daltonics GmbH, Bremen,  
196 Germany) instrument and the spectra were measured according to manufacturer's instructions  
197 (Bruker Daltonics GmbH, Bremen, Germany). For identification MALDI Biotyper and  
198 flexControl software were used.



199 Identification of coliform bacteria with MALDI-TOF MS is often very difficult as they are closely  
200 related and MALDI database is not designed for environmental bacteria. Therefore, the  
201 database was expanded to ensure accurate identification. Strains, previously identified via  
202 MLSA, were added to the database according to manufacturer's instructions.

### 203 **2.2.3. Multilocus sequence analysis (MLSA)**

204 Selected isolates were identified at the molecular level via MLSA. For DNA extraction bacterial  
205 material was transferred into 50 µl sterile water and then heated for 10 min at 95 °C. After  
206 cooling for at least 90 min at - 20 °C, DNA was used for further analysis. MLSA of the genes  
207 *atpD*, *infB*, *gyrB* and *rpoB* was performed according to Brady et al. (2013). Amplified PCR  
208 products were visualized using QIAxcel® Advanced System (Qiagen, Hilden, Germany) and  
209 purified by High Pure PCR Product Purification Kit (Roche, Mannheim, Germany) according to  
210 manufacturer's instructions. Purified DNA was sequenced by StarSEQ® GmbH (Mainz,  
211 Germany). Phylogenetic analysis was conducted with MEGA7 Version 7.0.26 (Kumar et al.,  
212 2016), using Maximum-Likelihood method and bootstrap values based on 1000 replications.

## 213 **2.3. Bacterial community composition and microbial source tracking**

### 214 **2.3.1. Sample pretreatment and DNA extraction**

215 Water samples (n = 31) for MST and analysis of microbial community were concentrated using  
216 membrane filtration (0.2 µm Supor®-200 membranes, 47 mm diameter, Pall Corporation, New  
217 York, USA). To analyze the fecal markers and the microbial community, total DNA was  
218 extracted from the membranes using the FastDNA™ SPIN Kit for Soil (MP Biomedicals, Santa  
219 Ana, USA) according to manufacturer's instructions. DNA quality was evaluated using  
220 NanoDrop (Implen, München, Germany).

### 221 **2.3.2. Quantification of microbial source tracking markers (MST)**

222 Microbial source tracking (MST) is a method to test water samples for a potential fecal pollution  
223 and their origin. It is based on the fact that specific microorganisms are associated with a  
224 specific host (Hagedorn et al., 2011). Quantitative real-time PCR (qPCR) of 16S rRNA

225 *Bacteroidales* was conducted according to Stange et al. (2019) to identify human, ruminant  
226 and pig specific fecal contaminations within the water samples (n = 31), as well as to estimate  
227 total amount of fecal contamination from a range of mammals (Layton et al., 2006). Amplified  
228 PCR-products were verified using QIAxcel<sup>®</sup> Advanced System (Qiagen, Hilden, Germany).  
229 Efficiency of PCR was between 90 and 105% with a R<sup>2</sup> value from 0.99. Limit of quantification  
230 (LOQ) was 10 copies per reaction.

### 231 **2.3.3. Analysis of microbial community**

232 For microbiome analysis the V3/V4 region of the 16S rRNA gene was amplified and sequenced  
233 at Core Facility Microbiome (Freising, Germany) using Illumina MiSeq<sup>®</sup> Next Generation  
234 Sequencing System. Raw sequence data (n = 869,073) were demultiplexed using Perl script,  
235 provided with IMNGS (Lagkourdos et al., 2016). For further analysis the IMNGS pipeline  
236 was used, which implements UPARSE algorithm from the USEARCH8 package (Edgar, 2010,  
237 2013). Sequences were clustered *de novo* to operational taxonomic units (OTUs) with 97%  
238 similarity and a relative abundance of  $\geq 0.25\%$ . After filtering and checking for chimeras,  
239 504,886 sequences were used for further analysis. Taxonomic classification was carried out  
240 using SINA 1.2.11 with a minimum identity query of at least 90% (Pruesse et al., 2012). A  
241 Neighbor-Joining tree with 100 bootstraps was conducted using MEGA7 Version 7.0.26  
242 (Kumar et al., 2016). For the analysis of microbial profile the R script Rhea was used  
243 (Lagkourdos et al., 2017).

### 244 **2.4. Statistical Analysis**

245 All statistical analysis were conducted with R (Ihaka and Gentleman, 1996; R Core Team,  
246 2019). Graphics were computed with the packages *ggplot2* (Wickham, 2016) and *ggpubr*  
247 (Kassambara, 2020). To determine statistical significant differences Mann-Whitney-U-test was  
248 performed.

249 For plotting the physicochemical parameters bilinear interpolation was conducted using the  
250 *akima* package (Akima and Gebhardt, 2016). The relation between physicochemical

251 parameters and coliform bacteria were revealed by the redundancy analysis (RDA) using *zoo*  
252 package (Zeileis and Grothendieck, 2005) for linear interpolation of the data and *vegan*  
253 package (Oksanen et al., 2019).  $R_2$  was adjusted using Ezekiel's formula (Ezekiel, 1930) to  
254 measure the unbiased amount of explained variation as described by Borcard et al. (2018).  
255 ANOVA like permutation test for RDA was performed using *vegan* package (Oksanen et al.,  
256 2019) with 999 permutations.

257 Alpha diversity was estimated using Shannon and Simpson index, where the latter adds more  
258 weight to abundant species. The indices were then transformed to effective number of species  
259 (Jost, 2006, 2007). Beta diversity examines differences between microbial profiles. Therefore  
260 generalized Unifrac distances were calculated using the package *GUniFrac* (Chen, 2018). For  
261 visualization a nonparametric multidimensional scaling (nMDS) plot was conducted using the  
262 packages *vegan* and *ade4* (Dray and Dufour, 2007; Oksanen et al., 2019).

## 263 **3. Results**

### 264 **3.1. Meteorological data**

265 For this study, the two reservoirs were monitored and regularly sampled for two seasons in  
266 2018 and 2019. The main characteristics of the two drinking water reservoirs sampled in this  
267 study are summarized in Table 1. The first year of the monitoring study was characterized by  
268 major storms in the first quarter of the year, followed by a dry and hot summer. It was the  
269 warmest year in Germany since weather records began in 1881 with an average temperature  
270 of 10.5 °C and one of the years with the least precipitation (DWD, 2018). For the Kleine Kinzig  
271 Reservoir, a mean air temperature of 9.7 °C was measured for the catchment area (Table 2).  
272 This represents an increase of 3.1 °C above the long-term average. Precipitation was 14%  
273 lower than the years before, but still amounted to 1454 l/m<sup>2</sup> in 2018. In Klingenberg mean air  
274 temperature was 9.2 °C. Total precipitation amounted to 536 l/m<sup>2</sup>, which is significant lower  
275 than at the Kleine Kinzig Reservoir ( $p < 0.001$ ). The second year, 2019, was again hot and dry.  
276 With 690 l/m<sup>2</sup> the precipitation was slightly higher in 2019 compared to 2018 (536 l/m<sup>2</sup>) at  
277 Klingenberg Reservoir, while the average air temperature (9.3 °C) was very similar to 2018. In  
278 the Kleine Kinzig Reservoir, mean air temperature was 9.1 °C. Total precipitation was  
279 1940 l/m<sup>2</sup>, which is in the usual range for this area.

### 280 **3.2. Physicochemical parameters**

281 During the whole investigation period, physicochemical parameters were analyzed. An  
282 overview is given in Table 2 for both reservoirs. Selected parameters (temperature, pH, O<sub>2</sub>  
283 content) are shown in Fig. 1.

284 The two reservoirs were selected since they are comparable in size, but differ in other  
285 parameters and represent a typical mesotrophic (Klingenberg) and oligotrophic (Kleine Kinzig)  
286 drinking water reservoir in Germany. Significant differences can be observed regarding their  
287 metal and nutrient content (Table 2). For example, TOC, nitrate as well as silicate content is  
288 higher in Klingenberg Reservoir ( $p < 0.001$ ), whereas total manganese and dissolved iron

289 content is higher in Kleine Kinzig Reservoir ( $p < 0.01$ ). Furthermore, Kleine Kinzig Reservoir  
290 as a humic material shaped reservoir has a higher SAK (254 nm).

291 The two reservoirs did not only differ with regard to the nutrient level, but also in water  
292 temperature. Klingenberg Reservoir is noticeably warmer with a mean water temperature 2 to  
293 3 °C higher than in Kleine Kinzig Reservoir (Table 2), mainly due to higher temperatures in the  
294 deeper water layers (Fig. 1) ( $p < 0.001$ ).

295 Stratification duration is another difference between the two reservoirs, caused by the  
296 differences in water temperature. For both reservoirs and years, stratification started in April,  
297 but it stopped much earlier in Klingenberg with the beginning of October, when temperature  
298 uniformity was reached and all layers had high water temperature. In Kleine Kinzig Reservoir,  
299 the stratification period lasted longer, until November in 2018 and until January 2020 in the  
300 2019 season.

### 301 **3.3. Seasonal changes of microbiological parameters**

302 Regular microbiological monitoring of surface water and raw water (used for drinking water  
303 production) included the parameters *E. coli*, coliform bacteria, enterococci, heterotrophic plate  
304 counts (at 22 °C and 36 °C) and total cell counts. Fig. 2 gives an overview about the measured  
305 numbers of these parameters, median values of coliform bacteria, enterococci and *E. coli* are  
306 shown in the Supplement (Table S1).

307 In Kleine Kinzig Reservoir, 44 samples of each water were analyzed during the monitoring  
308 study. In the majority of the samples, the FIB *E. coli* and enterococci could not be detected in  
309 100 ml water samples. With an abundance of 34% respectively 27% of the samples they were  
310 detected more often in the surface water samples than in the raw water samples (14% and  
311 9%, respectively). Maximum numbers of *E. coli* were 10 MPN/100 ml in the surface water and  
312 4 MPN/100 ml in raw water. For enterococci, the highest levels detected were 19 CFU/100 ml  
313 in the surface water and 2 CFU/100 ml in the raw water. Dominating species was the  
314 environmental enterococcus strain *Enterococcus rotai* (61% of positive results).

315 In contrast, coliform bacteria were detected in all except two samples (98%). As shown in Fig.  
316 2, the concentration of coliform bacteria varied over four orders of magnitude ranging from  
317 below detection limit in 100 ml to above  $2.4 \times 10^4$  MPN/100 ml. Periods of high concentrations  
318 have been observed in both years 2018 and 2019, starting from the end of June until the end  
319 of September. While the concentration of coliform bacteria remained high in 2019 over the  
320 entire summer period, a decrease in number could be observed in 2018 after the initial peak  
321 in June/July and a second peak occurred in November 2018. Highest numbers in coliform  
322 bacteria were observed in the surface water with a maximum of  $5.4 \times 10^3$  MPN/100 ml in June  
323 2018 and about ten times the amount in July 2019 ( $>2.4 \times 10^4$  MPN/100 ml). In the raw water,  
324 numbers were lower with a maximum number of about  $1.7 \times 10^3$  MPN/100 ml in both years.

325 In Klingenberg Reservoir regular sampling was conducted 32 times. The fecal indicators *E.*  
326 *coli* and enterococci could be detected more often than in the other reservoir. They were  
327 detected in 31% respectively 59% of all surface water samples and in 34% respectively 50%  
328 of all raw water samples. The highest values of *E. coli* were 7 MPN/100 ml, both in surface and  
329 raw water. Enterococci reached maximum numbers of 11 CFU/100 ml in raw water and  
330 23 CFU/100 ml in surface water.

331 Coliform bacteria were detected in all samples. In contrast to Kleine Kinzig Reservoir, the  
332 highest numbers of coliform bacteria were reached in the raw water with  $4.0 \times 10^3$  MPN/100 ml  
333 in September 2018. In the surface water, the maximum numbers were also detected in  
334 September 2018, but reached with  $2.1 \times 10^3$  MPN/100 ml a lower level. Surprisingly, these  
335 high numbers of coliforms were only observed in 2018. In 2019, the maximum number of  
336 coliform bacteria was  $2.3 \times 10^2$  MPN/100 ml, reached in September in the surface water.

337 In Klingenberg, the main inflow into the reservoir (Wilde Weißeritz) was also sampled regularly  
338 ( $n = 26$ ). In contrast to the reservoir (surface and raw water), the inflow did not show high  
339 seasonal differences. Other than in the reservoir, FIB *E. coli* and enterococci were detected in  
340 all samples. They reached maximum values of  $1.5 \times 10^2$  MPN/100 ml for *E. coli* and  
341  $4.2 \times 10^2$  CFU/100 ml for enterococci, thus around 1.5 orders of magnitude higher than in the

342 reservoir. Coliform bacteria were observed in all samples, too. Here the maximum number was  
343  $3.1 \times 10^3$  MPN/100 ml (Fig. 2).

#### 344 **3.4. Identification of coliform bacteria**

345 Seasonal dynamics were not only found for the number of coliform bacteria, but also for the  
346 species diversity, as shown in Fig. 3. Overall, 45 species of coliform bacteria, belonging to  
347 20 genera, could be identified. The five most abundant genera were *Serratia*, *Enterobacter*,  
348 *Lelliottia*, *Citrobacter* and *Buttiauxella*.

349 In Kleine Kinzig Reservoir at least 26 species of 11 genera could be identified. Mostly two  
350 genera of coliform bacteria dominated, namely *Lelliottia* (72%) and *Serratia* (21%). During  
351 winter, mainly *Serratia* occurred, but as soon as concentrations of coliform bacteria increased,  
352 *Lelliottia* was dominant. By measuring the species diversity using Simpson effective (Table  
353 S2), the diversity decreased during mass proliferation from three to four effective species to  
354 only two, namely *Lelliottia amnigena* and *Lelliottia aquatilis*.

355 The Klingenberg Reservoir differed considerably. In the reservoir 28 species out of 12 genera  
356 could be observed. As in Kleine Kinzig Reservoir *Serratia* dominated during winter period,  
357 *Lelliottia* also occurred frequently, but the genus did not dominate. Instead, *Enterobacter*  
358 *asburiae* dominated here during late summer 2018, the time with the highest concentrations  
359 of coliform bacteria. Species diversity showed an even higher change during this time as it  
360 decreased from about six effective species to only one. In this monitoring study, the first  
361 occurrence of *Enterobacter asburiae* was in June/July of both years in the surface water. In  
362 August, *Enterobacter asburiae* was observed in the raw water. While this species could only  
363 be identified sporadically in 2019, it dominated in 2018 from September onwards throughout  
364 the whole reservoir.

365 In contrast, the main inflow did not change much over the sampling period. Richness was much  
366 higher here, with 43 species out of 18 genera. The dominating genus was *Serratia*. In cases  
367 where *Enterobacter* was detected, it was mainly identified as *Enterobacter cloacae*. In the



368 inflow, no change in species diversity could be observed during times with high concentrations  
369 of coliform bacteria in the reservoir compared to times with low concentrations. The diversity  
370 was about six to seven effective species all over the years, thus higher than in the reservoir.

### 371 **3.5. Sampling campaign**

372 At Klingenberg Reservoir, two sampling campaigns were conducted in addition to the  
373 monitoring program in 2018, one in June and the other one in September. At that time, not  
374 only the six depth layers and the main inflow were sampled, but also the whole water body of  
375 the reservoir together with additional inflows. Fig. 4 gives an overview about the results of the  
376 quantification and identification of coliform bacteria for exemplary presented samples.

377 In June 2018 in addition to the six regular samples, 13 samples from the surface of the reservoir  
378 were sampled (n = 19). Furthermore, together with the main inflow (Wilde Weißeritz), another  
379 small inflow and the outflow of the pre-reservoir could be sampled (n = 3). All other tributaries  
380 had low water levels due to the drought during this year. As presented in Fig. 4A in the water  
381 of the reservoir, numbers of coliform bacteria were generally low with a median of  
382 33 MPN/100 ml (n = 19). Only in the inflow higher numbers of coliform bacteria were  
383 measured, e.g.  $5.8 \times 10^2$  MPN/100 ml at the main inflow, and  $2.6 \times 10^3$  MPN/100 ml at the  
384 outflow of the pre-reservoir.

385 From selected samples, coliform bacteria were identified (n = 11). Various genera were present  
386 in the reservoir water, like *Lelliottia* spp. (23%), *Serratia* spp. (19%), *Citrobacter* spp. (14%)  
387 and *Enterobacter* spp. (11%), most of them being identified as *Enterobacter asburiae*. In the  
388 main inflow, *Serratia* spp. dominated (56%), whereas in the pre-reservoir *Lelliottia* spp. was  
389 dominant (75%). The genus *Enterobacter* was only present in low abundance (4%) in the main  
390 inflow with all isolates identified as *Enterobacter cloacae*.

391 In September 2018, 14 additional samples from the water body of the reservoir were sampled,  
392 together with the depth profile (n = 20). Furthermore, the main inflow, the outflow of the pre-  
393 reservoir, as well as an additional water pipe from the Rauschenbach Reservoir were sampled



394 (n = 3). During that time, additional water was transferred from the Rauschenbach Reservoir  
395 into the Klingenberg Reservoir in order to prevent the reservoir from carrying too little water.  
396 Results are presented in Fig. 4B.

397 The observed numbers of coliform bacteria in the reservoir water (n = 20) were much higher  
398 than in June (median:  $1.4 \times 10^3$  MPN/100 ml), nearly all of them being identified as  
399 *Enterobacter asburiae* (95%). In the inflowing water, numbers of coliform bacteria reached  
400  $7 \times 10^2$  to  $1.6 \times 10^3$  MPN/100 ml. Similar to June, *Serratia* spp. dominated in the main inflow  
401 (52%) and *Lelliottia* spp. in the pre-reservoir (43%). In the pipe from Rauschenbach Reservoir,  
402 both genera had approximately the same frequencies (>40%). Less than 5% of all isolates  
403 from the inflows were identified as *Enterobacter* spp. (mainly *Enterobacter ludwigii*).

### 404 **3.6. Microbial Source Tracking (MST)**

405 The detection of MST markers indicates the potential source of hygienically-relevant microbial  
406 load in the reservoir. Therefore, samples were taken at two time points in each reservoir, once  
407 with high numbers of coliform bacteria, once without. For Klingenberg Reservoir in June and  
408 September 2018 surface water of the complete reservoir, the depth profile and all inflows were  
409 sampled, as part of the sampling campaign. In Kleine Kinzig Reservoir, sampling was  
410 conducted in July and December 2019 from the depth profile. With extracted DNA of the  
411 samples, qPCR with host-specific 16S rRNA sequences of *Bacteroidales* bacteria was carried  
412 out, to identify human-, ruminant- and pig-specific fecal contamination within the samples.  
413 These markers were compared to the total cell counts obtained by flow cytometry  
414 measurements as well as the total 16S rRNA genes quantified by qPCR (Table 3).

415 Altogether, the total amount of bacteria within the samples was around  $10^6$  bacteria per ml.  
416 TCC for all measured samples (n = 24) had a mean concentration of  $7.3 \times 10^5$  bacteria per ml,  
417 the measured 16S rRNA genes over all samples (n = 31) a mean concentration of  $1.1 \times 10^6$   
418 genes/ml (Table 3).

419 Unspecific marker genes, to measure all *Bacteroides* in the sample and therefore total amount  
420 of fecal contamination, made around 0.2% of all 16S rRNA ( $2 \times 10^3$  gene copies/ml). Neither  
421 human- nor ruminant-specific fecal marker genes were detected in any of the samples (<LOQ).  
422 Out of the total number of 31 samples, pig-specific fecal markers could only be detected once,  
423 in the main inflow (Wilde Weißeritz) of Klingenberg Reservoir in September with a  
424 concentration of  $4 \times 10^2$  genes/ml (Table 3).

### 425 **3.7. Microbial community**

426 To compare the microbial community between the two reservoirs, as well as between times  
427 with high and low concentrations of coliform bacteria, 16S rRNA gene amplicon sequencing  
428 was conducted. Therefore water samples were taken at two time points: with high and with low  
429 concentrations of coliform bacteria in the two reservoirs. For Klingenberg Reservoir this was  
430 June (low) and September 2018 (high), for Kleine Kinzig July (high) and December 2019 (low).

431 Overall 869,073 sequences from 31 water samples were demultiplexed. After checking for  
432 quality and chimeras 504,886 sequences were further analyzed. Altogether, 362 OTUs were  
433 observed within the water samples. Alpha diversity showed a richness of  $225 \pm 6$  OTUs per  
434 sample (Table S3). According to Shannon  $72 \pm 4$  effective OTUs per sample occurred. Adding  
435 more weight to abundant species, Simpson measures  $39 \pm 3$  effective OTUs per sample. Both,  
436 richness and diversity was slightly higher in Kleine Kinzig Reservoir than in Klingenberg  
437 Reservoir.

438 The OTUs could be assigned to 17 phyla (Fig. 5A). The three most abundant ones were  
439 *Actinobacteriota* (32.9%), *Proteobacteria* (31.2%) and *Bacteroidota* (20.4%). Fig. 5B gives an  
440 overview about the order assigned to these three phyla. The most abundant order was  
441 *Frankiales* (*Actinobacteraeota*) with the family *Sporichthyaceae* (25.9%). The most abundant  
442 order within *Proteobacteria* was *Burkholderiales* with the family *Comamonadaceae*. The order  
443 to which the coliform bacteria belong (*Enterobacterales*) was not very common with only  
444 0.04%. By comparing the two reservoirs with Kruskal-Wallis Rank Sum Test it could be

445 observed that *Bacteroidota* were significantly more abundant in Klingenberg than in Kleine  
446 Kinzig Reservoir ( $p < 0.001$ ), whereas the *Planctomycetota* were significantly more abundant  
447 in the latter ( $p < 0.001$ ) (data not shown).

448 Nonparametric multidimensional analyses of phylogenetic distances between the samples  
449 revealed that clusters were built according to the reservoir (Fig. 5C). Nevertheless, no  
450 significant differences could be observed between time points with high or with low numbers  
451 of coliform bacteria.

### 452 **3.8. Redundancy Analysis (RDA)**

453 To define parameters affecting the proliferation of coliform bacteria, RDA was conducted using  
454 data from surface and raw water (Fig. 6). Permutation test for RDA revealed different factors  
455 explaining the variance of coliform species in Klingenberg (Fig. 6A) as well as Kleine Kinzig  
456 Reservoir (Fig. 6B), e.g. environmental factors (water temperature, oxygen, pH value and SAK)  
457 as well as metals and nutrients (manganese, iron, TOC) and microbiological parameters  
458 (TCC). Furthermore, some factors were only significant for the variation in one of the two  
459 reservoirs: air temperature, chlorophyll, total phosphate, silicate, nitrate, HPC at 22 °C  
460 (Klingenberg) and conductivity and turbidity (Kleine Kinzig). For both reservoirs, depth was no  
461 significant factor for species composition.

462 Factors correlating positively with the proliferating coliform species were in both reservoirs the  
463 water temperature as well as manganese content. Both were additionally negatively correlated  
464 with SAK and TOC. Furthermore, *Enterobacter* spp. in Klingenberg Reservoir were correlated  
465 with total phosphate (positive) and oxygen content (negative). The occurrence of *Lelliottia* spp.  
466 in Kleine Kinzig Reservoir was negatively correlated with *Serratia* spp., iron, as well as TCC.

### 467 **3.9. Other reservoirs**

468 In this study, the two genera *Enterobacter* and *Lelliottia* were identified as being present in  
469 drinking water reservoirs during times with high concentrations of coliform bacteria, thus,  
470 assumingly being capable to proliferate within these reservoirs, depending on the reservoir

471 being investigated (see discussion below). Therefore, the question arose how the situation  
472 was in other drinking water reservoirs and lakes, where mass proliferation of coliform bacteria  
473 has been observed.

474 Water samples and isolates of coliform bacteria from different lakes and reservoirs in Germany  
475 were analyzed. The results are summarized in Table 4. The phylogenetic analysis of the  
476 isolated strains by MLSA is shown in Fig. 7. It turned out that *Enterobacter asburiae* could be  
477 detected in several other reservoirs and lakes during times with high numbers of coliform  
478 bacteria, like in Lake Constance, Rappbode Reservoir, located in the Harz Mountains in  
479 Saxony-Anhalt, and Breitenbach Reservoir in North Rhine-Westphalia. *Lelliottia amnigena*  
480 could be detected and identified in Söse Reservoir, located in the Harz Mountains in Lower  
481 Saxony during mass proliferation.

## 482 4. Discussion

### 483 4.1. Mass proliferation of coliform bacteria during the summer months is dominated by 484 *Enterobacter asburiae* and *Lelliottia* spp.

485 In this study, seasonal dynamics of coliform bacteria in two reservoirs in Germany were  
486 investigated. The two reservoirs were selected, as high numbers of coliform bacteria have  
487 been observed in previous years. Both reservoirs are similar in size, but apart from that are  
488 different and can be regarded as representative for typical mesotrophic (Klingenberg) and  
489 oligotrophic (Kleine Kinzig) drinking water reservoirs.

490 During summer months, numbers of coliform bacteria suddenly increased in both reservoirs  
491 and reached densities of  $10^3$  MPN/100 ml and more in the whole depth profile of the reservoir  
492 as well as the entire water body. Not only the number but also the species composition  
493 changed entirely. Diversity decreased to only one or two species of coliform bacteria.  
494 Therefore, we assume that this sudden increase of single or a few species can be considered  
495 as a mass proliferation of coliform bacteria or “coliform bloom” within the reservoir (see also  
496 further discussion below).

497 Depending on the reservoir *E. asburiae*, *L. amnigena* or *L. aquatilis*, respectively, were  
498 dominating. Interestingly, closely related strains were found in different reservoirs all over  
499 Germany (Fig. 7). They are well known to occur in water, e.g. *L. amnigena* (formerly  
500 *Enterobacter amnigenus*) and *L. aquatilis* were first described as being isolated from water  
501 samples (Izard et al., 1981; Kämpfer et al., 2008; Kämpfer et al., 2018). *Enterobacter asburiae*  
502 belongs to the *Enterobacter cloacae* complex, a complex consisting of clinical as well as  
503 environmental isolates, whose taxonomy remains complicated and differentiation is difficult  
504 (Brady et al., 2013; Hoffmann and Roggenkamp, 2003; Mezzatesta et al., 2012). The species  
505 was initially isolated from clinical material, however its clinical significance is still uncertain  
506 since it also occurs in environmental samples like water (Brenner et al., 1986; Davin-Regli et  
507 al., 2019; Kämpfer et al., 2008; Sanders and Sanders, 1997; Suzuki et al., 2018). Furthermore,

508 proliferation of *Enterobacter* spp. has been described in drinking water distribution systems  
509 (Edberg et al., 1994).

#### 510 **4.2. Frankiales and Burkholderiales dominate the microbial community**

511 To see effects of proliferation events on the microbial community, 16S rRNA amplicon analysis  
512 was conducted. The three most abundant phyla were *Actinobacteriota*, *Bacteroidota* and  
513 *Proteobacteria*. All three phyla are well known to occur in drinking water samples as well as  
514 freshwater habitats (Paruch et al., 2019; Perrin et al., 2019; Pinto et al., 2014; Rodriguez-R et  
515 al., 2020; Tamames et al., 2010; Vaz-Moreira et al., 2014; Zeng et al., 2013). *Firmicutes*, which  
516 on the contrary are frequently measured in gastrointestinal microbiome and are reported as  
517 one of the major human fecal bacteria in watershed, were not abundant (Paruch et al., 2019;  
518 Unno et al., 2010).

519 *Actinobacteriota* are Gram-positive bacteria distributed in aquatic as well as terrestrial  
520 ecosystems and constitute one of the largest bacterial phyla (Barka et al., 2016). They have a  
521 mycelial lifestyle and an extensive secondary metabolism. *Frankiales* are known to dominate  
522 *Actinobacteriota* in water samples (Pinel et al., 2020). *Frankia* is a nitrogen-fixing  
523 actinobacterium and is associated with plants (Barka et al., 2016; Rosenberg et al., 2014).  
524 *Actinobacteriota* have previously been described as small bacteria with LNA-content (Proctor  
525 et al., 2018). This is consistent with the high numbers of LNA-content bacteria detected during  
526 this study amounting to about 75% (Table 3).

527 *Proteobacteria* have been reported to be the most abundant bacteria in epilimnic waters,  
528 especially *Burkholderiales* dominate in less productive reservoirs like oligotrophic and  
529 mesotrophic ones (Llirós et al., 2014). They can be associated with cyanobacteria or particles  
530 and have been correlated to DOC and nitrate concentration (Llirós et al., 2014).  
531 *Burkholderiales* are a diverse order, belonging to the  $\beta$ -*Proteobacteria*, including strictly  
532 aerobic and facultative anaerobic chemoorganotrophs, obligate and facultative  
533 chemolithotrophs, nitrogen-fixing organisms, as well as plant, animal and human pathogens

534 (Garrity et al., 2005). The family most abundant during this study was the chemoorganotrophic  
535 or facultative chemolithotrophic *Comamonadaceae*, where isolates have been obtained from  
536 various sources including soil, water and environment (Garrity et al., 2005; Pinto et al., 2014;  
537 Tamames et al., 2010).

538 Within the *Proteobacteria* it was expected to detect the order *Enterobacterales* frequently,  
539 especially during times with high concentrations of coliform bacteria. Nevertheless, this was  
540 not the case. They only had a frequency of 0.04%. By comparing the maximum concentration  
541 of coliform bacteria ( $2.4 \times 10^4$  MPN/100 ml) with the TCC and 16S rRNA genes, even these  
542 high concentrations of coliform bacteria make only around 0.02% of the total bacterial cells.  
543 Therefore it is not surprising, that no significant differences of the microbial community could  
544 be found between samples with high and low coliform bacteria numbers.

545 Instead, significant differences in the bacterial community could be found regarding the two  
546 reservoirs. *Bacteroidota* were significantly more abundant in Klingenberg, whereas  
547 *Planctomycetota* were significantly more abundant in Kleine Kinzig Reservoir ( $p < 0.001$ ). This  
548 is consistent to results shown by Lliros et al. (2014) where the origin of the samples had the  
549 greatest effect on differences in the bacterial community composition, compared to season  
550 and water layer.

#### 551 **4.3. Proliferation as an autochthonous process in the reservoir**

552 As fecal contamination of raw water is a major challenge for drinking water suppliers  
553 (Gunnarsdottir et al., 2020), an extremely important question for them as well as for health  
554 authorities is whether these observed high numbers of coliform bacteria are related to fecal  
555 contamination, which would possibly implicate health risks. To address this question, FIB  
556 *E. coli* and enterococci were monitored during the entire sampling period, as coliform bacteria  
557 do not permit correlation on fecal influence. Furthermore, the inflow into the reservoir was  
558 compared with the reservoir water. Additionally, the reservoir water was tested for fecal MST  
559 marker genes.

560 In Germany, drinking water reservoirs are surrounded by a drinking water protection zone in  
561 order to minimize hazards within the catchment area (see e.g. WHO, 2016). In addition, pre-  
562 reservoirs serve as a barrier, e.g. to reduce the direct introduction of storm water into the main  
563 reservoir, which can be detected by elevated numbers of microbial indicator parameters  
564 (Balzer et al., 2010; Kistemann et al., 2002). In contrast to coliform bacteria and HPC, the FIB  
565 did not reach high numbers during the time of mass proliferation, even more they were not  
566 detectable in the majority of the samples. Most of the enterococci were identified as  
567 *Enterococcus rotai*, a species known to occur mainly in invertebrates like mosquitoes (Hügler  
568 et al., 2014; Sedláček et al., 2013). In general, enterococci do not only occur in feces, but also  
569 in the environment (see Byappanahalli et al., 2012 and references therein). The concentration  
570 of *E. coli* – the bacterium proposed to be the best indicator for fecal contamination from human  
571 as well as livestock or wildlife sources (Edberg et al., 2000; Farnleitner et al., 2010) – was even  
572 lower than enterococci. RDA revealed no correlation between the proliferating coliform species  
573 and the measurement of FIB (Fig 6). Thus, the high numbers of coliform bacteria in the  
574 reservoirs were not accompanied with increased numbers of FIB. Therefore, it can be assumed  
575 that coliform growth is not due to fecal contamination.

576 The analysis of the Klingenberg inflow confirms this assumption. Klingenberg Reservoir (raw  
577 water and surface water) was compared with its main inflow (Wilde Weißeritz) (Fig. 8, Table  
578 S1). In 2018, the year with the mass proliferation of coliform bacteria, it could be observed that  
579 numbers of all three indicators were usually at least 10 times higher in the inflow than in the  
580 reservoir. Only during the summer months, i.e. during the mass proliferation, the numbers of  
581 coliform bacteria reached higher maxima in the reservoir than in the inflow. However, the fecal  
582 indicators *E. coli* and enterococci were significantly higher in the inflow ( $p \leq 0.05$ ).  
583 Furthermore, FIB were below detection limit (1 per 100 ml) in many samples in the reservoir,  
584 whereas in the inflow these bacteria were detectable in all samples. This shows that the  
585 reservoir and its inflow were significantly different. This and the fact that *E. asburiae* was not  
586 detected in the main inflow during the sampling supports the conclusion that mass proliferation  
587 of coliform bacteria is an autochthonous process within the reservoir.



588 For MST, specific *Bacteroidales* genes were tested during this study. These bacteria are one  
589 of the most abundant bacterial groups in the intestine of warm-blooded animals (Hagedorn et  
590 al., 2011). Therefore, quantification of *Bacteroides* 16S rRNA is a reliable method to estimate  
591 fecal contamination within water samples as well as the fecal origin, due to their co-evolution  
592 with specific hosts (Ahmed et al., 2016). During this study, unspecific *Bacteroides* 16S rRNA  
593 made around 0.2% of all 16S rRNA ( $2 \times 10^3$  gene copies/ml). These numbers are relative low,  
594 as 1 g of feces in 1 L of water contains approximately  $10^{10}$  gene copies of unspecific  
595 *Bacteroides* markers, which normally makes about one third of the fecal bacteria (Layton et  
596 al., 2006). Human- and ruminant-specific markers could not be detected. Furthermore, only  
597 one sample, namely the main inflow into the Klingenberg Reservoir, had a low fecal burden of  
598 pigs ( $4 \times 10^2$  gene copies/ml) in September. As this sampling spot is surrounded by forest, it is  
599 possible that the influence is caused by wild pigs, as they are also detected with this primer  
600 set (Lamendella et al., 2013). As this was the only sample with an influence from pig feces, it  
601 can be concluded that fecal contaminations in the inflow did not reach the reservoir. Fecal  
602 contamination results in an increase of *Bacteroides* markers, together with FIB (Stange and  
603 Tiehm, 2020). Furthermore, *Bacteroidales* are usually two to three orders of magnitude more  
604 abundant in human and animal intestine than coliform bacteria (Hagedorn et al., 2011). This  
605 was not the case in the reservoir waters. Thus, quantification of MST marker genes further  
606 suggested that the increase of coliform bacteria in the reservoirs did not correspond with fecal  
607 contaminations.

608 Together with the fact that the proliferating coliform species are rarely found in clinical material  
609 (Sanders and Sanders, 1997), and no *Firmicutes* could be detected in the 16S rRNA amplicon  
610 analysis of the reservoir waters, the aforementioned results indicate, that the growth of coliform  
611 bacteria within the reservoir is an autochthonous effect and is not due to fecal contamination.

#### 612 **4.4. Parameters affecting the proliferation of coliform bacteria**

613 As fecal contamination is not the reason for the proliferation of coliform bacteria in drinking  
614 water reservoirs, the question arises what other factors possibly influence this process?

615 Further questions are: Where, i.e. in which water depth or layer does the proliferation of  
616 coliform bacteria start? And how can these bacteria spread throughout the entire water body  
617 of the reservoirs? Therefore, RDA was conducted, to define parameters affecting the  
618 proliferation of coliform bacteria (Fig. 6).

619 For both proliferating species, *Enterobacter* spp. as well as *Lelliottia* spp., temperature was  
620 one of the mayor factors correlating with their occurrence, with *Lelliottia* proliferating earlier in  
621 summer compared to *Enterobacter*. One reason for that could be a lower growth temperature,  
622 since *Lelliottia* spp. have been shown to propagate even at lower temperatures than  
623 *Enterobacter* spp. (Izard et al., 1981; Leclerc et al., 2001). The connection of seasonal  
624 variability of coliform bacteria and temperature in surface waters, river and soil has been  
625 reported in several cases before (Cho et al., 2016; Hong et al., 2010; Jeon et al., 2019;  
626 LeChevallier et al., 1996). Higher water temperatures as well as water scarcity are predicted  
627 to increase in many regions of the world due to climate change (Bates et al., 2008; Dokulil et  
628 al., 2006; Mosley, 2015). In the last 40 years, water temperature in lakes has increased around  
629 0.1 to 1.5 °C (Bates et al., 2008). Furthermore, stratification period has lengthened (Bates et  
630 al., 2008). This affects many physicochemical as well as biological parameters (Delpla et al.,  
631 2009), and we anticipate that the mass proliferation of coliform bacteria occurs even more  
632 frequently in future.

633 But not only water temperature, also oxygen content as well as nutrients and metals are  
634 important for bacterial growth. RDA also revealed oxygen and manganese as factors  
635 explaining the variance of coliform species in the reservoirs. As a consequence of stratification  
636 in reservoirs, oxygen consumption in the hypolimnion can lead to the solution of metals and  
637 nutrients from the sediment. Highest release of manganese from sediments into the water  
638 occurs in summer, when reservoirs are stratified (Munger et al., 2019). As facultative anaerobic  
639 bacteria coliform bacteria may have an advantage compared to other bacteria in this  
640 environment. Furthermore, in Klingenberg Reservoir correlation with total phosphate was  
641 found. *Enterobacter* spp. are known as plant growth promoting bacteria (Andrés-Barrao et al.,

642 2017; Oh et al., 2018; Taghavi et al., 2010) capable of phosphate mobilization (Gyaneshwar  
643 et al., 1999; Mezzatesta et al., 2012; Vazquez et al., 2000). This could explain the correlation  
644 of coliform bacteria and total phosphate.

645 Where does the mass proliferation begin? It is conceivable that mass proliferation could start  
646 near the thermocline, as inactivation due to UV-light is lower in this region (Davies-Colley et  
647 al., 1994). Additionally, particles together with associated bacteria settle down, as well as  
648 nutrients form an upward flux (Davis et al., 2005). It is therefore possible that this layer is  
649 enriched with particles of dead algae, which can serve as nutrients for heterotrophic bacteria  
650 like the coliform bacteria (Cole, 1982; Kouzuma and Watanabe, 2015; McFeters et al., 1978),  
651 thus leading to increased concentrations of bacteria near the thermocline (Davis et al., 2005;  
652 McDonough et al., 1986).

653 Another open question is how the coliform bacteria manage to colonize the entire reservoir in  
654 all depth layers, even when the reservoir is stratified. Due to drinking water production, raw  
655 water is extracted from the hypolimnion of the reservoirs. This withdrawal influences both  
656 volume as well as temperature of the hypolimnion (Çalışkan and Elçi, 2009; Casamitjana et  
657 al., 2003; Mi et al., 2019; Weber et al., 2017). As the hypolimnion warms up, thermal stability  
658 decreases. Additionally, withdrawal can produce buoyancy forces and the withdrawal layer  
659 may even intersect the thermocline (Çalışkan and Elçi, 2009; Fischer et al., 1979). This could  
660 explain how the bacteria may overcome the thermocline and occur in all depth layers at least  
661 in smaller reservoirs. Furthermore, *E. asburiae* is reported as a quorum sensing bacterium,  
662 capable to communicate with surrounding bacteria (Lau et al., 2013; Lau et al., 2020).  
663 However, the adaption of these bacteria to their productivity-poor environment is not yet  
664 solved. These habitats pose a challenge for bacteria, especially when it comes not only to  
665 survive but also to proliferation (Kundu et al., 2020). Therefore, further research is needed, to  
666 understand the exact place of the origin of proliferation, the ways the bacteria distribute in the  
667 water column and the adaptations of these bacteria to their environment.

668 The mass proliferation in the two reservoirs seems to be caused by different factors, as not  
669 only RDA, but also the time of mass proliferation determines. In Klingenberg Reservoir it is  
670 starting much later, in the end of summer, compared to Kleine Kinzig Reservoir in early  
671 summer season. Furthermore, *Lelliottia* spp. is detectable in both reservoirs during the whole  
672 year, with low numbers between January and May. *Enterobacter*, however, was not present in  
673 the reservoir, only when it comes to mass proliferation. Furthermore, highest numbers in  
674 Klingenberg Reservoir have been observed in raw water depth, in Kleine Kinzig Reservoir,  
675 however, the opposite was the case and highest numbers were measured in the surface layer.  
676 Differences between the two reservoirs were observed regarding temperature, as well as  
677 nutrient content. Especially in Klingenberg, nitrate, silicate and TOC are higher. Taken  
678 together, this leads to the conclusion that both effects are influenced by different factors. Water  
679 temperature might be one of the leading causes of mass proliferation of coliform bacteria. Yet,  
680 additional factors seem to be important (e.g. manganese, oxygen, phosphate) that have to be  
681 investigated in further research.

#### 682 **4.5. Implications for drinking water treatment**

683 Climate change leads to enhanced water temperatures and extreme water events. So  
684 droughts, heavy rain events and flooding are expected to happen more frequently. Thus, it is  
685 anticipated, that mass proliferations of coliform bacteria in drinking water reservoirs also occur  
686 more often in the near future. At some reservoirs, these events are observed almost on a yearly  
687 basis. This challenges drinking water treatment. Currently, water treatment plants treating  
688 reservoir water mainly use conventional treatment techniques like flocculation and filtration,  
689 followed by disinfection. Even with a fully functional treatment technology, it is conceivable that  
690 coliform bacteria might overcome drinking water treatment in times with high densities of more  
691 than  $10^4$  bacteria per 100 ml in raw water. If coliform bacteria reach drinking water distribution  
692 systems, they might proliferate in biofilm or in sediments within the system (Camper, 1993;  
693 Edberg et al., 1994; LeChevallier et al., 1996). This could lead to the exceeding of limit values  
694 (e.g. according to EU drinking water directive, coliform bacteria should not be detectable in

695 100 ml), often followed by countermeasures like additional disinfection measures or even  
696 boiling advices.

697 Thus, it is essential to increase our knowledge about coliform bacteria, especially with regard  
698 to strains capable to propagate in drinking water reservoirs and potentially also in drinking  
699 water systems under certain conditions. Genome analyses in combination with specific growth  
700 experiments are conceivable to answer open questions with regard to the hygienic relevance  
701 of these bacteria and their adaptations to oligotrophic environments. Furthermore, monitoring  
702 of proliferation events on a high spatial and temporal resolution could give further insights and  
703 answer remaining questions.

## 704 5. Conclusion

- 705 • In our monitoring of drinking water reservoirs, we detected seasonal differences in  
706 numbers of coliform bacteria.
- 707 • During summer months, the maximum density of coliform bacteria reached values of  
708 more than  $10^4$  bacteria per 100 ml in these oligotrophic environments, not only in the  
709 surface but also in raw water (used for drinking water production). This represents an  
710 increase of 4 orders of magnitude compared to the winter season.
- 711 • At this time, only one or two strains of coliform bacteria dominated the entire water body  
712 of the reservoir, belonging to the genera *Lelliottia* or *Enterobacter*. Closely related  
713 strains were found in different reservoirs all over Germany.
- 714 • Our study demonstrates that proliferation was not due to fecal contamination but is an  
715 autochthonic process within the water column of the reservoirs.
- 716 • We conclude that this sudden increase of single species can be considered as a mass  
717 proliferation of coliform bacteria or “coliform bloom” within the reservoir.
- 718 • Microbial community was dominated by *Actinobacteriota*, *Bacteroidota* and  
719 *Proteobacteria* and did not change significantly during periods of mass proliferation.  
720 *Enterobacterales* only make around 0.04% of the community.
- 721 • RDA revealed correlation of proliferating coliform species with increased water  
722 temperatures, lower oxygen content as well as nutrients and metals (phosphate,  
723 manganese).

724 **Declarations of interest**

725 The authors declare that they have no known competing financial interests or personal  
726 relationships that could have appeared to influence the work reported in this paper.

727 **Acknowledgment**

728 This research was funded by the German Federal Ministry of Education and Research (BMBF  
729 grant no. 02WGR1426A-G, project TRUST) and the German Technical and Scientific  
730 Association for Gas and Water (DVGW grants no. W 201720 and W 201823). We thank  
731 Margret Sommer and Gerhard Biwer from Kleine Kinzig Reservoir, as well as Thilo Hegewald  
732 from Klingenberg Reservoir for providing samples and access to the reservoirs. We further  
733 thank the water suppliers Fernwasserversorgung Elbaue-Ostharz, Harzwasserwerke,  
734 Stadtwerk am See and Wasserverband Siegen-Wittgenstein for providing water samples.  
735 Furthermore, we thank Monika Bösl, Lydia Grabner, Luisa Telpl and Carolin Schweikart (TZW  
736 Karlsruhe), as well as Jana Angermann, Annett Schröter, Claudia Kupfer and Susann  
737 Bromberger (TZW Dresden) for laboratory support at TZW.

## 738 References

- 739 Ahmed W, Hughes B, Harwood V. Current status of marker genes of *Bacteroides* and related  
740 taxa for identifying sewage pollution in environmental waters. *Water* 2016;8(6):231.
- 741 Akima H, Gebhardt A. akima: Interpolation of irregularly and regularly spaced data, 2016.  
742 <https://CRAN.R-project.org/package=akima>.
- 743 Andrés-Barrao C, Lafi FF, Alam I, Zélicourt A de, Eida AA, Bokhari A et al. Complete Genome  
744 Sequence Analysis of *Enterobacter* sp. SA187, a Plant Multi-Stress Tolerance Promoting  
745 Endophytic Bacterium. *Front. Microbiol.* 2017;8:2023.
- 746 Ashbolt NJ, Grabow WOK, Snozzi M. Indicators of microbial water quality. In: World Health  
747 Organization (WHO), editor. *Water quality: Guidelines, standards and health: Assessment*  
748 *of risk and risk management for water-related infectious disease*. London: IWA Publishing;  
749 2001. p. 289–315.
- 750 Balzer M, Witt N, Flemming HC, Wingender J. Faecal indicator bacteria in river biofilms. *Water*  
751 *Sci. Technol. Water Supply* 2010;61(5):1105–11.
- 752 Barka EA, Vatsa P, Sanchez L, Gaveau-Vaillant N, Jacquard C, Meier-Kolthoff JP et al.  
753 Taxonomy, physiology, and natural products of *Actinobacteria*. *Microbiol. Mol. Biol. Rev.*  
754 2016;80(1):1–43.
- 755 Bates B, Kundzewicz ZW, Wu S, Burkett V, Doell P, Gwary D et al. *Climate change and Water:*  
756 *Technical paper of the Intergovernmental Panel on Climate Change*. Geneva, Switzerland:  
757 IPCC Secretariat; 2008.
- 758 Borcard D, Gillet F, Legendre P. *Numerical Ecology with R*. Cham: Springer International  
759 Publishing; 2018.
- 760 Brady C, Cleenwerck I, Venter S, Coutinho T, Vos P de. Taxonomic evaluation of the genus  
761 *Enterobacter* based on multilocus sequence analysis (MLSA): proposal to reclassify *E.*  
762 *nimipressuralis* and *E. amnigenus* into *Lelliottia* gen. nov. as *Lelliottia nimipressuralis*  
763 comb. nov. and *Lelliottia amnigena* comb. nov., respectively, *E. gergoviae* and *E. pyrinus*  
764 into *Pluralibacter* gen. nov. as *Pluralibacter gergoviae* comb. nov. and *Pluralibacter pyrinus*  
765 comb. nov., respectively, *E. cowanii*, *E. radicincitans*, *E. oryzae* and *E. arachidis* into



766 *Kosakonia* gen. nov. as *Kosakonia cowanii* comb. nov., *Kosakonia radicincitans* comb.  
767 nov., *Kosakonia oryzae* comb. nov. and *Kosakonia arachidis* comb. nov., respectively, and  
768 *E. turicensis*, *E. helveticus* and *E. pulveris* into *Cronobacter* as *Cronobacter zurichensis*  
769 nom. nov., *Cronobacter helveticus* comb. nov. and *Cronobacter pulveris* comb. nov.,  
770 respectively, and emended description of the genera *Enterobacter* and *Cronobacter*. Syst.  
771 Appl. Microbiol. 2013;36(5):309–19.

772 Brenner DJ, McWhorter AC, Kai A, Steigerwalt AG, Farmer JJ. *Enterobacter asburiae* sp. nov.,  
773 a new species found in clinical specimens, and reassignment of *Erwinia dissolvens* and  
774 *Erwinia nimipressuralis* to the genus *Enterobacter* as *Enterobacter dissolvens* comb. nov.  
775 and *Enterobacter nimipressuralis* comb. nov. J. Clin. Microbiol. 1986;23(6):1114–20.

776 Byappanahalli MN, Nevers MB, Korajkic A, Staley ZR, Harwood VJ. Enterococci in the  
777 environment. Microbiol. Mol. Biol. Rev. 2012;76(4):685–706.

778 Çalışkan A, Elçi Ş. Effects of selective withdrawal on hydrodynamics of a stratified reservoir.  
779 Water Resour. Manag. 2009;23(7):1257–73.

780 Camper AK. Coliform regrowth and biofilm accumulation in drinking water systems: a review.  
781 In: Geesey, G.G., Z. Lewandowski, H.-C. Flemming, editor. Biofouling and Biocorrosion in  
782 Industrial Water Systems: Lewis Publishers; 1993. p. 91–105.

783 Casamitjana X, Serra T, Colomer J, Baserba C, Pérez-Losada J. Effects of the water  
784 withdrawal in the stratification patterns of a reservoir. Hydrobiologia 2003;504(1-3):21–8.

785 Chen J. GUniFrac: Generalized UniFrac Distances, 2018. [https://CRAN.R-](https://CRAN.R-project.org/package=GUniFrac)  
786 [project.org/package=GUniFrac](https://CRAN.R-project.org/package=GUniFrac).

787 Cho KH, Pachepsky YA, Kim M, Pyo J, Park M-H, Kim YM et al. Modeling seasonal variability  
788 of fecal coliform in natural surface waters using the modified SWAT. J. Hydrol.  
789 2016;535:377–85.

790 Cole JJ. Interactions between bacteria and algae in aquatic ecosystems. Annu. Rev. Ecol.  
791 Syst. 1982;13(1):291–314.

- 792 Davies-Colley RJ, Bell RG, Donnison AM. Sunlight inactivation of enterococci and fecal  
793 coliforms in sewage effluent diluted in seawater. *Appl. Environ. Microbiol.*  
794 1994;60(6):2049–58.
- 795 Davin-Regli A, Lavigne J-P, Pagès J-M. *Enterobacter* spp.: Update on taxonomy, clinical  
796 aspects, and emerging antimicrobial resistance. *Clin. Microbiol. Rev.* 2019;32(4).
- 797 Davis K, Anderson MA, Yates MV. Distribution of indicator bacteria in Canyon Lake, California.  
798 *Water Res.* 2005;39(7):1277–88.
- 799 Delpla I, Jung A-V, Baures E, Clement M, Thomas O. Impacts of climate change on surface  
800 water quality in relation to drinking water production. *Environ. Int.* 2009;35(8):1225–33.
- 801 Deutscher Wetterdienst (DWD). Jahrbuch 2018 des Deutschen Wetterdienstes. Offenbach;  
802 2018.
- 803 Dokulil MT, Jagsch A, George GD, Anneville O, Jankowski T, Wahl B et al. Twenty years of  
804 spatially coherent deepwater warming in lakes across Europe related to the North Atlantic  
805 Oscillation. *Limnol. Oceanogr.* 2006;51(6):2787–93.
- 806 Dray S, Dufour A. The ade4 Package: Implementing the Duality Diagram for Ecologists. *J.*  
807 *Stat. Softw.* 2007;22(4):1–20.
- 808 Drinking Water Ordinance. Ordinance on the quality of water intended for human consumption  
809 (Trinkwasserverordnung – TrinkwV 2001): TrinkwV; 2001.
- 810 Edberg SC, Patterson JE, Smith DB. Differentiation of distribution systems, source water, and  
811 clinical coliforms by DNA analysis. *J. Clin. Microbiol.* 1994;32(1):139–42.
- 812 Edberg SC, Rice EW, Karlin RJ, Allen MJ. *Escherichia coli*: the best biological drinking water  
813 indicator for public health protection. *J. Appl. Microbiol.* 2000;88:106S–116S.
- 814 Edgar RC. Search and clustering orders of magnitude faster than BLAST. *Bioinformatics*  
815 2010;26(19):2460–1.
- 816 Edgar RC. UPARSE: highly accurate OTU sequences from microbial amplicon reads. *Nat.*  
817 *Methods* 2013;10(10):996–8.
- 818 European Community. Council Directive 98/83/EC of 3 November 1998 on the quality of water  
819 intended for human consumption: European Community Drinking Water Directive; 1998.

- 820 Exner M, Behringer K, Wernicke F, Dautzenberg W. Erfahrungen mit Coliformen-Befunden in  
821 einem Trinkwasser-Talsperrensystem in Nordrhein-Westfalen. In: Arbeitsgemeinschaft  
822 Trinkwassertalsperren e.V. (ATT). Coliformen-Befunde gemäß Trinkwasserversordnung  
823 2001: Bewertung und Maßnahmen: Siegburg. München: Kommissionsverlag Oldenbourg  
824 Industrieverlag GmbH; 2005.
- 825 Ezekiel M. Methods of Correlation Analysis. Wiley, New York 1930.
- 826 Farnleitner AH, Ryzinska-Paier G, Reischer GH, Burtscher MM, Knetsch S, Kirschner AKT et  
827 al. *Escherichia coli* and enterococci are sensitive and reliable indicators for human,  
828 livestock and wildlife faecal pollution in alpine mountainous water resources. J. Appl.  
829 Microbiol. 2010;109(5):1599–608.
- 830 Fischer HB, List JE, Koh CR, Imberger J, Brooks NH. Mixing in inland and coastal waters.  
831 Burlington: Elsevier Science; 1979.
- 832 Freier K, Feuerpfeil I, Hummel A, Schulze H, Buder G. Erfahrungen mit Coliformen-Befunden  
833 an Trinkwassertalsperren in Sachsen. In: Arbeitsgemeinschaft Trinkwassertalsperren e.V.  
834 (ATT). Coliformen-Befunde gemäß Trinkwasserversordnung 2001: Bewertung und  
835 Maßnahmen: Siegburg. München: Kommissionsverlag Oldenbourg Industrieverlag GmbH;  
836 2005.
- 837 Garrity GM, Bell JA, Lilburn T. Class II. Betaproteobacteria class. nov. In: Brenner DJ, Krieg  
838 NR, Staley JT, editors. Bergey's Manual® of Systematic Bacteriology. Boston, MA:  
839 Springer; 2005.
- 840 Gunnarsdottir MJ, Gardarsson SM, Figueras MJ, Puigdomènech C, Juárez R, Saucedo G et  
841 al. Water safety plan enhancements with improved drinking water quality detection  
842 techniques. Sci. Total Environ. 2020;698:134185.
- 843 Gyaneshwar P, Parekh LJ, Archana G, Poole PS, Collins MD, Hutson RA et al. Involvement  
844 of a phosphate starvation inducible glucose dehydrogenase in soil phosphate solubilization  
845 by *Enterobacter asburiae*. FEMS Microbiol. Lett. 1999;171(2):223–9.
- 846 Hagedorn C, Blanch AR, Harwood VJ. Microbial source tracking: Methods, applications, and  
847 case studies. New York: Springer; 2011.

- 848 Hammes F, Berney M, Wang Y, Vital M, Köster O, Egli T. Flow-cytometric total bacterial cell  
849 counts as a descriptive microbiological parameter for drinking water treatment processes.  
850 Water Res. 2008;42(1-2):269–77.
- 851 Hoffmann H, Roggenkamp A. Population genetics of the nomenspecies *Enterobacter cloacae*.  
852 Appl. Environ. Microbiol. 2003;69(9):5306–18.
- 853 Hong H, Qiu J, Liang Y. Environmental factors influencing the distribution of total and fecal  
854 coliform bacteria in six water storage reservoirs in the Pearl River Delta Region, China. J.  
855 Environ. Sci. 2010;22(5):663–8.
- 856 Hügler M, Petzoldt H, Nitsche R, Hamsch B, Korth A. Mosquitoes as a source for enterococci  
857 in drinking water samples. IWA World Water Congress & Exhibition 2014 2014.
- 858 Ihaka R, Gentleman R. R: A language for data analysis and graphics. J. Comput. Graph. Stat.  
859 1996;5(3):299–314.
- 860 International Organization for Standardization (ISO). Water quality - Detection and  
861 enumeration of intestinal enterococci - Part 2: Membrane filtration method, 2000:1–7.
- 862 International Organization for Standardization (ISO). Water quality - Enumeration of  
863 *Escherichia coli* and coliform bacteria - Part 2: Most probable number method, 2012:1–45.
- 864 Izard D, Gavini F, Trinel PA, Leclerc H. Deoxyribonucleic acid relatedness between  
865 *Enterobacter cloacae* and *Enterobacter amnigenus* sp. nov. Int. J. Syst. Bacteriol.  
866 1981;31(1):35–42.
- 867 Jeon DJ, Ligaray M, Kim M, Kim G, Lee G, Pachepsky YA et al. Evaluating the influence of  
868 climate change on the fate and transport of fecal coliform bacteria using the modified SWAT  
869 model. Sci. Total Environ. 2019;658:753–62.
- 870 Jost L. Entropy and diversity. Oikos 2006;113(2):363–75.
- 871 Jost L. Partitioning diversity into independent alpha and beta components. Ecology  
872 2007;88(10):2427–39.
- 873 Kämpfer P, Glaeser SP, Packroff G, Behringer K, Exner M, Chakraborty T et al. *Lelliottia*  
874 *aquatilis* sp. nov., isolated from drinking water. Int. J. Syst. Evol. Microbiol.  
875 2018;68(8):2454–61.

- 876 Kämpfer P, Nienhüser A, Packroff G, Wernicke F, Mehling A, Nixdorf K et al. Molecular  
877 identification of coliform bacteria isolated from drinking water reservoirs with traditional  
878 methods and the Colilert-18 system. *Int. J. Hyg. Environ. Health* 2008;211(3-4):374–84.
- 879 Kassambara A. ggpubr: 'ggplot2' Based Publication Ready Plots, 2020. [https://cran.r-](https://cran.r-project.org/web/packages/ggpubr/index.html)  
880 [project.org/web/packages/ggpubr/index.html](https://cran.r-project.org/web/packages/ggpubr/index.html).
- 881 Kirschner AKT, Reischer GH, Jakwerth S, Savio D, Ixenmaier S, Toth E et al. Multiparametric  
882 monitoring of microbial faecal pollution reveals the dominance of human contamination  
883 along the whole Danube River. *Water Res.* 2017;124:543–55.
- 884 Kistemann T, Classen T, Koch C, Dangendorf F, Fischeder R, Gebel J et al. Microbial load of  
885 drinking water reservoir tributaries during extreme rainfall and runoff. *Appl. Environ.*  
886 *Microbiol.* 2002;68(5):2188–97.
- 887 Kouzuma A, Watanabe K. Exploring the potential of algae/bacteria interactions. *Curr. Opin.*  
888 *Biotechnol.* 2015;33:125–9.
- 889 Kumar S, Stecher G, Tamura K. MEGA7: Molecular evolutionary genetics analysis version 7.0  
890 for bigger datasets. *Mol. Biol. Evol.* 2016;33(7):1870–4.
- 891 Kundu K, Weber N, Griebler C, Elsner M. Phenotypic heterogeneity as key factor for growth  
892 and survival under oligotrophic conditions. *Environ. Microbiol.* 2020.
- 893 Lagkouvardos I, Fischer S, Kumar N, Clavel T. Rhea: A transparent and modular R pipeline  
894 for microbial profiling based on 16S rRNA gene amplicons. *PeerJ* 2017;5:e2836.
- 895 Lagkouvardos I, Joseph D, Kapfhammer M, Giritli S, Horn M, Haller D et al. IMNGS: A  
896 comprehensive open resource of processed 16S rRNA microbial profiles for ecology and  
897 diversity studies. *Sci. Rep.* 2016;6:33721.
- 898 Lamendella R, Li KC, Oerther D, Santo Domingo JW. Molecular diversity of *Bacteroidales* in  
899 fecal and environmental samples and swine-associated subpopulations. *Appl. Environ.*  
900 *Microbiol.* 2013;79(3):816–24.
- 901 Lau YY, How KY, Yin W-F, Chan K-G. Functional characterization of quorum sensing LuxR-  
902 type transcriptional regulator, EasR in *Enterobacter asburiae* strain L1. *PeerJ*  
903 2020;8:e10068.

- 904 Lau YY, Sulaiman J, Chen JW, Yin W-F, Chan K-G. Quorum sensing activity of *Enterobacter*  
905 *asburiae* isolated from lettuce leaves. *Sensors* 2013;13(10):14189–99.
- 906 Layton A, McKay L, Williams D, Garrett V, Gentry R, Saylor G. Development of Bacteroides  
907 16S rRNA gene TaqMan-based real-time PCR assays for estimation of total, human, and  
908 bovine fecal pollution in water. *Appl. Environ. Microbiol.* 2006;72(6):4214–24.
- 909 LeChevallier MW, Welch NJ, Smith DB. Full-scale studies of factors related to coliform  
910 regrowth in drinking water. *Appl. Environ. Microbiol.* 1996;62(7):2201–11.
- 911 Leclerc H, Mossel DA, Edberg SC, Struijk CB. Advances in the bacteriology of the coliform  
912 group: their suitability as markers of microbial water safety. *Ann. Rev. Microbiol.*  
913 2001;55:201–34.
- 914 Llíros M, Inceoğlu Ö, García-Armisen T, Anzil A, Leporcq B, Pigneur L-M et al. Bacterial  
915 community composition in three freshwater reservoirs of different alkalinity and trophic  
916 status. *PloS one* 2014;9(12):e116145.
- 917 Magnuson, Robertson, Benson, Wynne, Livingstone, Arai et al. Historical trends in lake and  
918 river ice cover in the northern hemisphere. *Science* 2000;289(5485):1743–6.
- 919 McDonough RJ, Sanders RW, Porter KG, Kirchman DL. Depth distribution of bacterial  
920 production in a stratified lake with an anoxic hypolimnion. *Appl. Environ. Microbiol.*  
921 1986;52(5):992–1000.
- 922 McFeters GA, Stuart SA, Olson SB. Growth of Heterotrophic Bacteria and Algal Extracellular  
923 Products in Oligotrophic Waters. *Applied Environmental and Public Health Microbiology*  
924 1978.
- 925 Mezzatesta ML, Gona F, Stefani S. *Enterobacter cloacae* complex: clinical impact and  
926 emerging antibiotic resistance. *Future Microbiol.* 2012;7(7):887–902.
- 927 Mi C, Sadeghian A, Lindenschmidt K-E, Rinke K. Variable withdrawal elevations as a  
928 management tool to counter the effects of climate warming in Germany’s largest drinking  
929 water reservoir. *Environ Sci Eur* 2019;31(1):2283.
- 930 Mosley LM. Drought impacts on the water quality of freshwater systems; review and  
931 integration. *Earth-Sci. Rev.* 2015;140:203–14.

- 932 Munger ZW, Carey CC, Gerling AB, Doubek JP, Hamre KD, McClure RP et al. Oxygenation  
933 and hydrologic controls on iron and manganese mass budgets in a drinking-water reservoir.  
934 Lake and Reservoir Management 2019;35(3):277–91.
- 935 Octavia S, Lan R. The Family *Enterobacteriaceae*. In: Rosenberg E, DeLong EF, Lory S,  
936 Stackebrandt E, Thompson F, editors. The Prokaryotes. Berlin, Heidelberg: Springer; 2014.  
937 p. 225–286.
- 938 Oh M, Han JW, Lee C, Choi GJ, Kim H. Nematicidal and Plant Growth-Promoting Activity of  
939 *Enterobacter asburiae* HK169: Genome Analysis Provides Insight into Its Biological  
940 Activities. Journal of microbiology and biotechnology 2018;28(6):968–75.
- 941 Oksanen J, Blanchet FG, Friendly M, Kindt R, Legendre P, McGlenn D et al. vegan: Community  
942 Ecology Package. R package version 2.5-6; 2019.
- 943 Packroff G, Clasen J. Eine Massenentwicklung von *Enterobacter asburiae* im Wasser der  
944 Wahnbachtalsperre im September 2003. In: Arbeitsgemeinschaft Trinkwassertalsperren  
945 e.V. (ATT). Coliformen-Befunde gemäß Trinkwasserversordnung 2001: Bewertung und  
946 Maßnahmen: Siegburg. München: Kommissionsverlag Oldenbourg Industrieverlag GmbH;  
947 2005.
- 948 Paruch L, Paruch AM, Eiken HG, Sørheim R. Faecal pollution affects abundance and diversity  
949 of aquatic microbial community in anthropo-zoogenically influenced lotic ecosystems. Sci.  
950 Rep. 2019;9(1):19469.
- 951 Perrin Y, Bouchon D, Delafont V, Moulin L, Héchar Y. Microbiome of drinking water: A full-  
952 scale spatio-temporal study to monitor water quality in the Paris distribution system. Water  
953 Res. 2019;149:375–85.
- 954 Pinel ISM, Moed DH, Vrouwenvelder JS, van Loosdrecht MCM. Bacterial community dynamics  
955 and disinfection impact in cooling water systems. Water Res. 2020;172:115505.
- 956 Pinto AJ, Schroeder J, Lunn M, Sloan W, Raskin L. Spatial-temporal survey and occupancy-  
957 abundance modeling to predict bacterial community dynamics in the drinking water  
958 microbiome. mBio 2014;5(3):e01135-14.



- 959 Prest EI, Hammes F, Kötzsch S, van Loosdrecht MCM, Vrouwenvelder JS. Monitoring  
960 microbiological changes in drinking water systems using a fast and reproducible flow  
961 cytometric method. *Water Res.* 2013;47(19):7131–42.
- 962 Proctor CR, Besmer MD, Langenegger T, Beck K, Walser J-C, Ackermann M et al.  
963 Phylogenetic clustering of small low nucleic acid-content bacteria across diverse  
964 freshwater ecosystems. *ISME J.* 2018;12(5):1344–59.
- 965 Pruesse E, Peplies J, Glöckner FO. SINA: Accurate high-throughput multiple sequence  
966 alignment of ribosomal RNA genes. *Bioinformatics* 2012;28(14):1823–9.
- 967 R Core Team. R: A language and environment for statistical computing. Vienna, Austria: R  
968 Foundation for Statistical Computing; 2019.
- 969 Rodriguez-R LM, Tsementzi D, Luo C, Konstantinidis KT. Iterative subtractive binning of  
970 freshwater chronoserries metagenomes identifies over 400 novel species and their ecologic  
971 preferences. *Environ. Microbiol.* 2020.
- 972 Rosenberg E, DeLong EF, Lory S, Stackebrandt E, Thompson F. *Actinobacteria*. In:  
973 Rosenberg E, DeLong EF, Lory S, Stackebrandt E, Thompson F, editors. *The Prokaryotes*.  
974 Berlin, Heidelberg: Springer; 2014.
- 975 Sanders WE, Sanders CC. *Enterobacter* spp.: pathogens poised to flourish at the turn of the  
976 century. *Clin. Microbiol. Rev.* 1997;10(2):220–41.
- 977 Sedláček I, Holochová P, Mašlaňová I, Kosina M, Spröer C, Bryndová H et al. *Enterococcus*  
978 *ureilyticus* sp. nov. and *Enterococcus rotai* sp. nov., two urease-producing enterococci from  
979 the environment. *Int. J. Sys. Evol. Microbiol.* 2013;63(2):502–10.
- 980 Stange C, Tiehm A. Occurrence of antibiotic resistance genes and microbial source tracking  
981 markers in the water of a karst spring in Germany. *Sci. Total Environ.* 2020:140529.
- 982 Stange C, Yin D, Xu T, Guo X, Schäfer C, Tiehm A. Distribution of clinically relevant antibiotic  
983 resistance genes in Lake Tai, China. *Sci. Total Environ.* 2019;655:337–46.
- 984 Statistisches Bundesamt. Öffentliche Wasserversorgung und öffentliche  
985 Abwasserentsorgung: Öffentliche Wasserversorgung; 2018. Fachserie 19 Reihe 2.1.1.



- 986 Stevens M, Ashbolt NJ, Cunliffe D. Review of coliforms as microbial indicators of drinking water  
987 quality: Recommendations to change the use of coliforms as microbial indicators of  
988 drinking water quality. Canberra: Australian Government National Health and Medical  
989 Research Council (NHMRC); 2003.
- 990 Suzuki Y, Niina K, Matsuwaki T, Nukazawa K, Iguchi A. Bacterial flora analysis of coliforms in  
991 sewage, river water, and ground water using MALDI-TOF mass spectrometry. *J. Environ.*  
992 *Sci. Health A* 2018;53(2):160–73.
- 993 Taghavi S, van der Lelie D, Hoffman A, Zhang Y-B, Walla MD, Vangronsveld J et al. Genome  
994 sequence of the plant growth promoting endophytic bacterium *Enterobacter* sp. 638. *PLoS*  
995 *genetics* 2010;6(5):e1000943.
- 996 Tamames J, Abellán JJ, Pignatelli M, Camacho A, Moya A. Environmental distribution of  
997 prokaryotic taxa. *BMC Microbiol.* 2010;10:85.
- 998 Unno T, Jang J, Han D, Kim JH, Sadowsky MJ, Kim O-S et al. Use of barcoded pyrosequencing  
999 and shared OTUs to determine sources of fecal bacteria in watersheds. *Environ. Sci.*  
1000 *Technol.* 2010;44(20):7777–82.
- 1001 Vaz-Moreira I, Nunes OC, Manaia CM. Bacterial diversity and antibiotic resistance in water  
1002 habitats: searching the links with the human microbiome. *FEMS Microbiol. Rev.*  
1003 2014;38(4):761–78.
- 1004 Vazquez P, Holguín G, Puente ME, Lopez-Cortes A, Bashan Y. Phosphate-solubilizing  
1005 microorganisms associated with the rhizosphere of mangroves in a semiarid coastal  
1006 lagoon. *Biology and Fertility of Soils* 2000;30(5-6):460–8.
- 1007 Wasserchemische Gesellschaft, Deutsches Institut für Normung e.V. Deutsche  
1008 Einheitsverfahren zur Wasser-, Abwasser- und Schlammuntersuchung. 1st ed. Germany:  
1009 Wiley-VCH Verlag GmbH & Co. KGaA; Beuth Verlag GmbH; 2020.
- 1010 Weber M, Rinke K, Hipsey MR, Boehrer B. Optimizing withdrawal from drinking water  
1011 reservoirs to reduce downstream temperature pollution and reservoir hypoxia. *J. Environ.*  
1012 *Manage.* 2017;197:96–105.
- 1013 Wickham H. *ggplot2: Elegant graphics for data analysis*. 1st ed. New York: Springer; 2016.

- 1014 World Health Organization (WHO). Protecting surface water for health: Identifying, assessing  
1015 and managing drinking-water quality risks in surface-water catchments. Geneva,  
1016 Switzerland: WHO Library Cataloguing-in-Publication Data; 2016.
- 1017 World Health Organization (WHO). Guidelines for drinking-water quality: fourth edition  
1018 incorporating the first addendum. 4th ed. Geneva: World Health Organization; 2017.
- 1019 Zeileis A, Grothendieck G. zoo: S3 Infrastructure for Regular and Irregular Time Series. *J. Stat.*  
1020 *Softw.* 2005;14(6).
- 1021 Zeng D-N, Fan Z-Y, Chi L, Wang X, Qu W-D, Quan Z-X. Analysis of the bacterial communities  
1022 associated with different drinking water treatment processes. *World J. Microbiol. Biotech.*  
1023 2013;29(9):1573–84.
- 1024

1025 **Highlights**

- 1026 • Coliform bacteria proliferate in drinking water reservoirs *to values above*  $10^4$  per 100 ml
- 1027 • The genera *Lelliottia* and *Enterobacter* can form these “coliform blooms”
- 1028 • Mass proliferation is an autochthonic process, not related to fecal contaminations
- 1029 • It is related to water temperature and appears mainly in summer
- 1030 • It is expected to occur more often in future due to climate change

1031 **Graphical abstract**

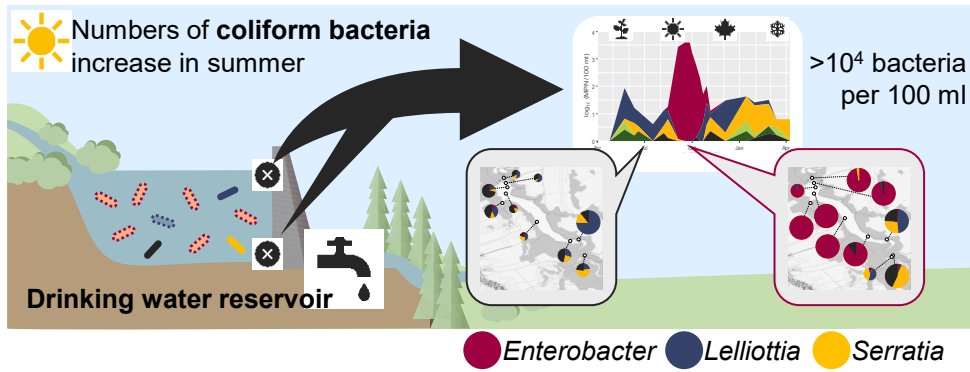

1032

1033 **Figures**

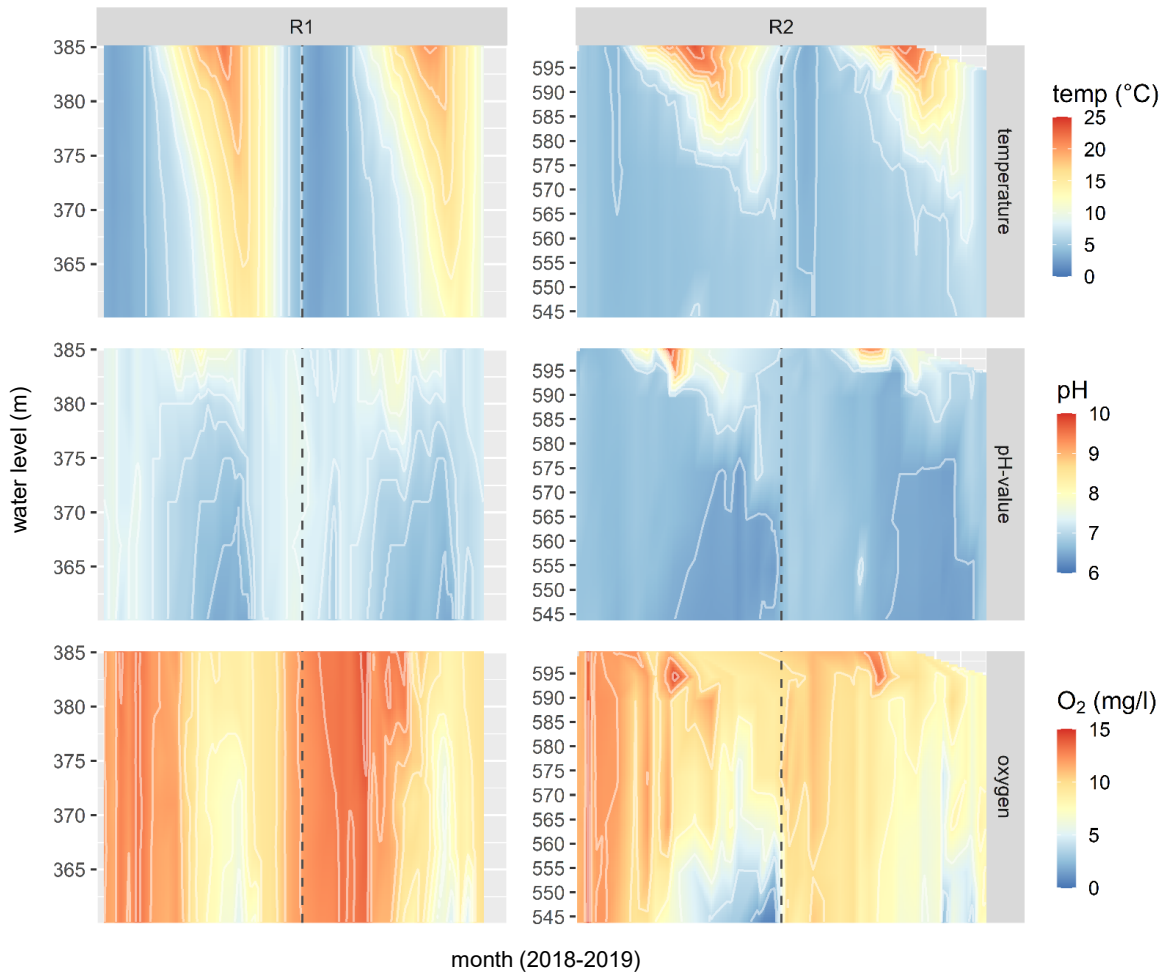

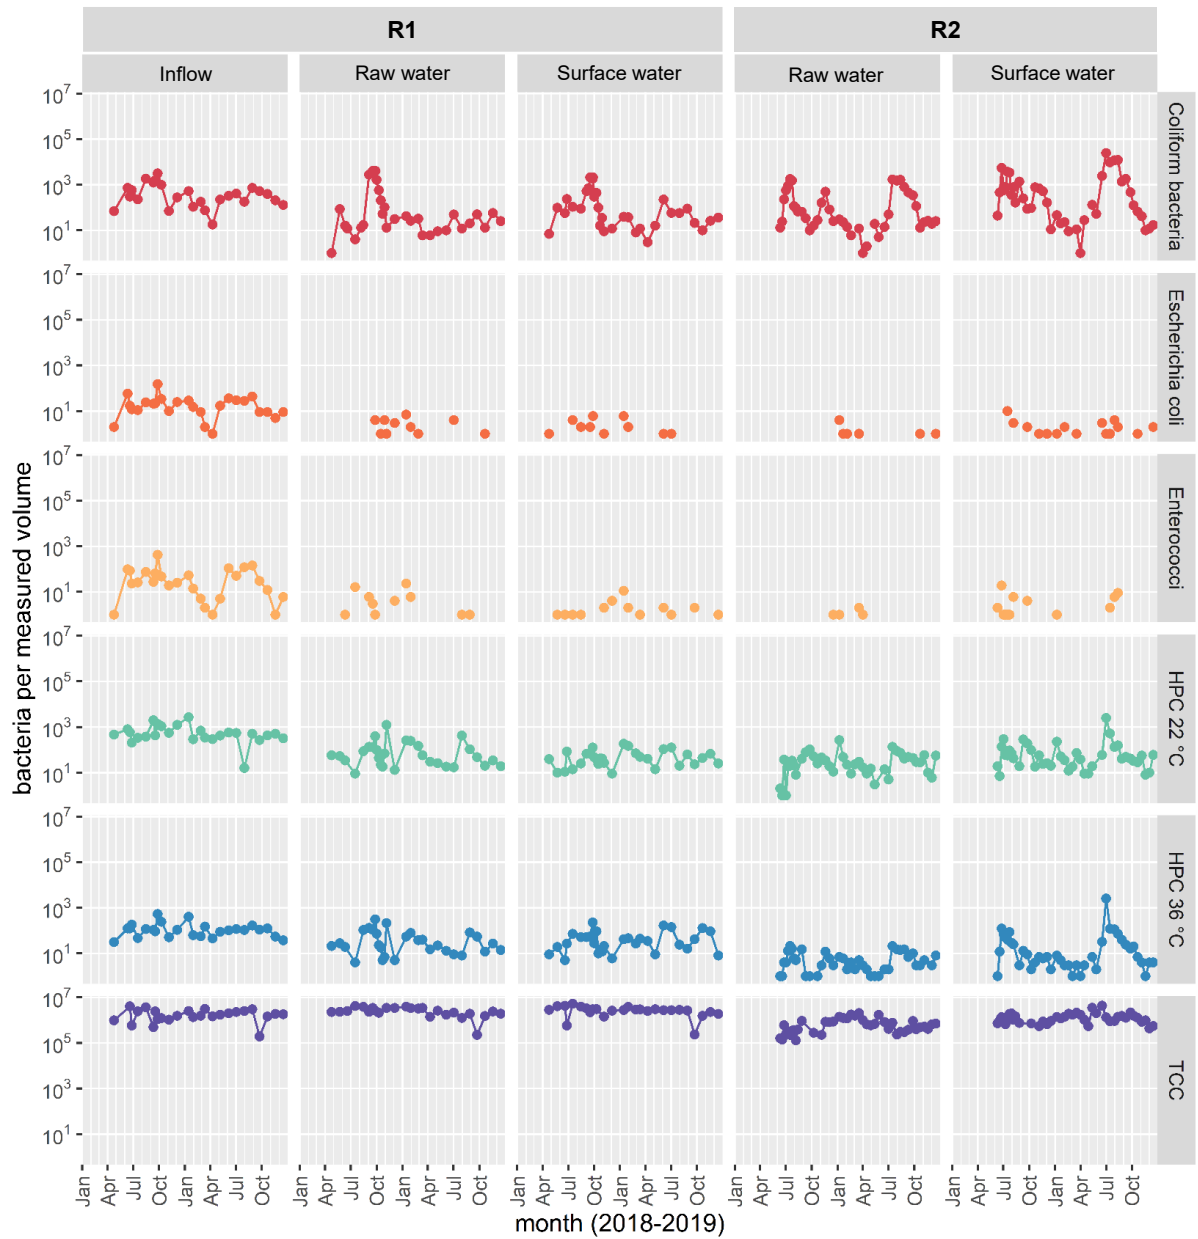

1038

1039 **Fig. 2:** Microbiological parameters in Klingenberg (R1) and Kleine Kinzig (R2) reservoirs in  
1040 2018 and 2019. The investigated volume was 100 ml for coliform bacteria, *Escherichia coli* and  
1041 enterococci and 1 ml for HPC at 22 °C and 36 °C and the total cell count (TCC).

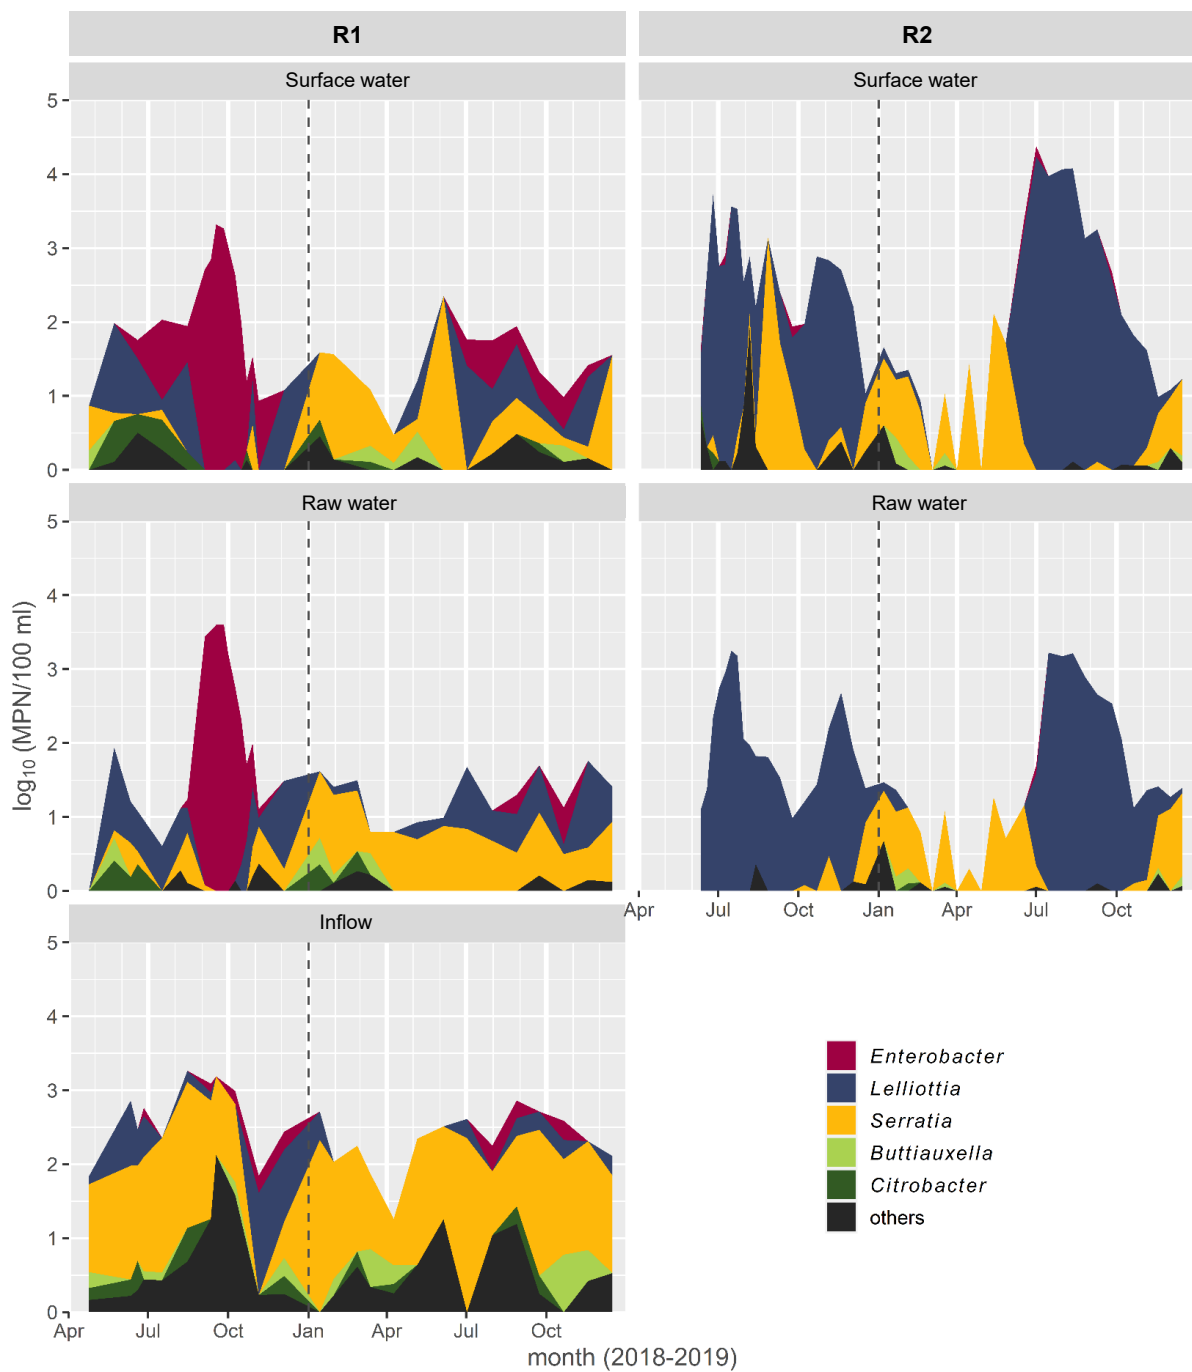

1042

1043 **Fig. 3:** Number and genera of the coliform bacteria in the Klingenberg (R1) and Kleine Kinzig

1044 Reservoir (R2) in 2018 and 2019. "Others" include the genera: *Dickeya*, *Hafnia*, *Klebsiella*,

1045 *Kluyvera*, *Kosakonia*, *Leclercia*, *Moellerella*, *Morganella*, *Pantoea*, *Plesiomonas*, *Proteus*,

1046 *Providencia*, *Rahnella*, *Raoultella* and *Yersinia*.

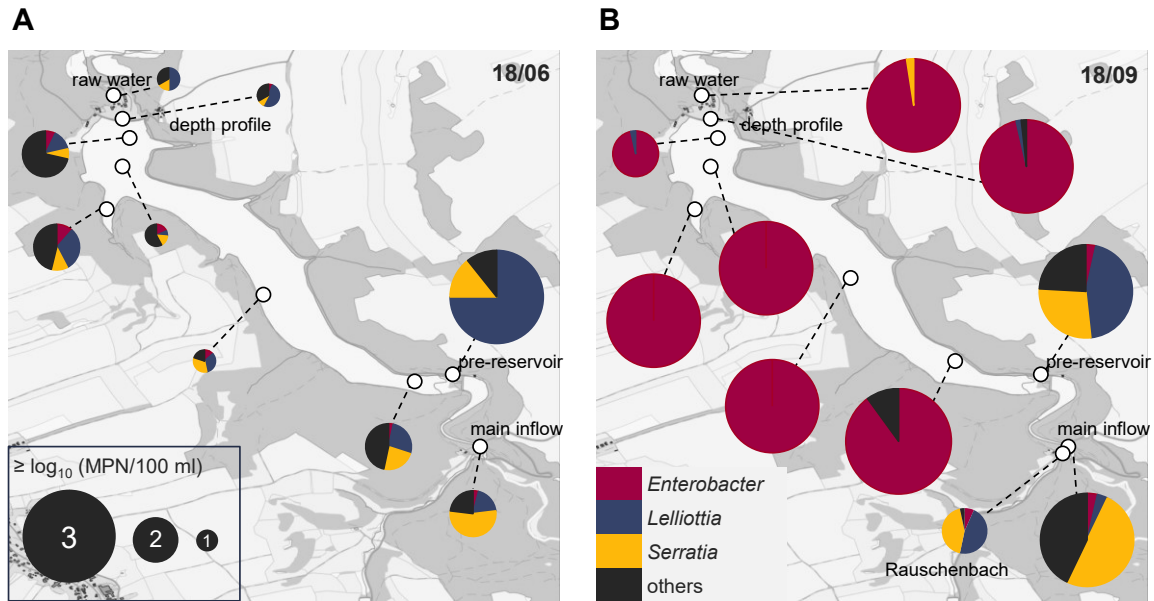

1047

1048 **Fig. 4:** Quantification and identification of coliform bacteria at the Klingenberg Reservoir during

1049 sampling campaign in June (A) and September 2018 (B).



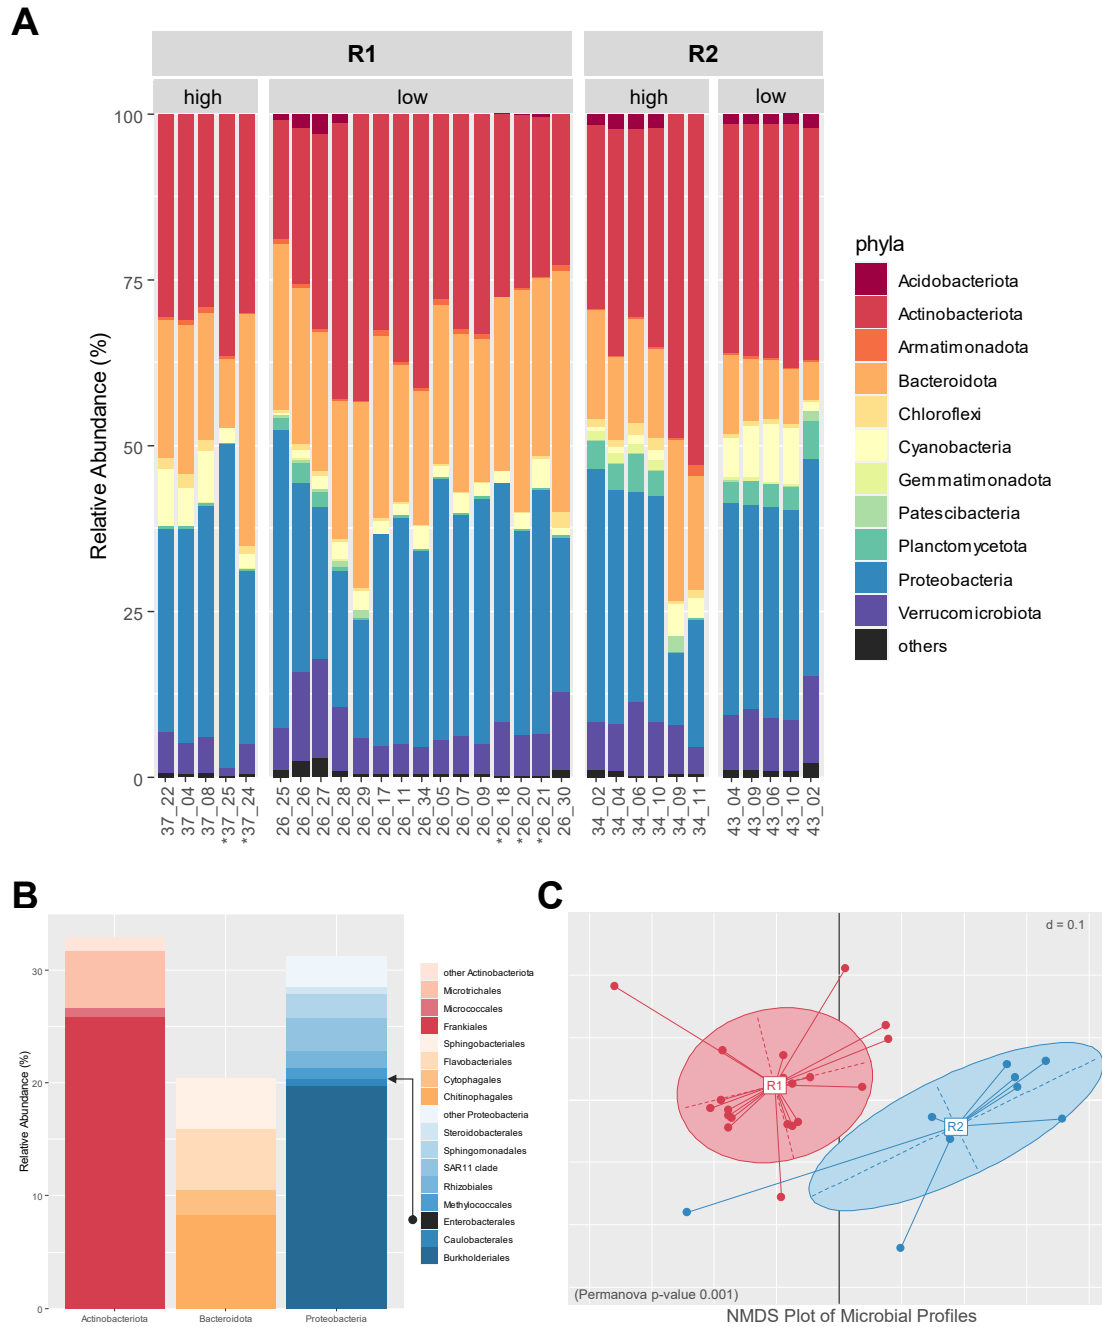

1050

1051 **Fig. 5:** Analysis of the microbial community in the Klingenberg (R1) and Kleine Kinzig  
 1052 Reservoir (R2). Samples marked with \* represent inflows (A). Detailed presentation of the three  
 1053 most abundant phyla *Actinobacteriota*, *Bacteroidota* and *Proteobacteria* (B). The  
 1054 *Enterobacteriales* are highlighted with the black arrow. Two-dimensional nonparametric  
 1055 multidimensional scaling (NMDS) of the two reservoirs based on generalized UniFrac  
 1056 distances (C).

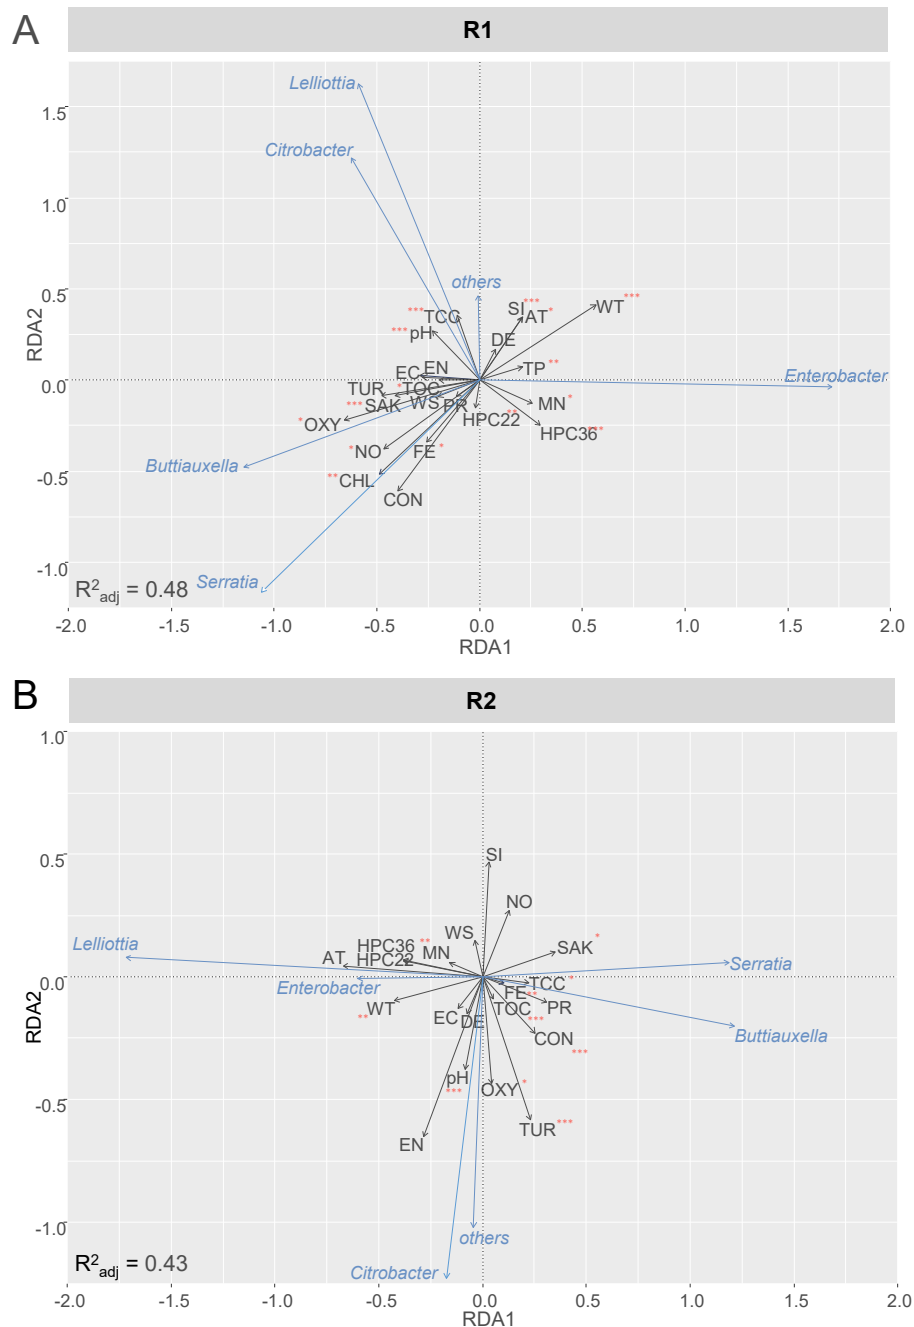

1057

1058 **Fig. 6:** Redundancy Analysis to reveal relationship between physicochemical parameters and  
 1059 coliform bacteria in Klingenberg Reservoir (A) and Kleine Kinzig Reservoir (B). DE = depth,  
 1060 PR = precipitation, WS = wind speed, AT = air temperature, WT = water temperature, pH =  
 1061 pH-value, OXY = oxygen, CON = conductivity at 25 °C, TUR = turbidity, SAK = SAK 254 nm,  
 1062 CHL = chlorophyll a, TOC = total organic carbon, NO = nitrate, SI = silicate, TP = total  
 1063 phosphate, MN = manganese, FE = iron. Statistical significance is represented by \* ( $p < 0.05$ ),  
 1064 \*\* ( $p < 0.01$ ) and \*\*\* ( $p < 0.001$ ).

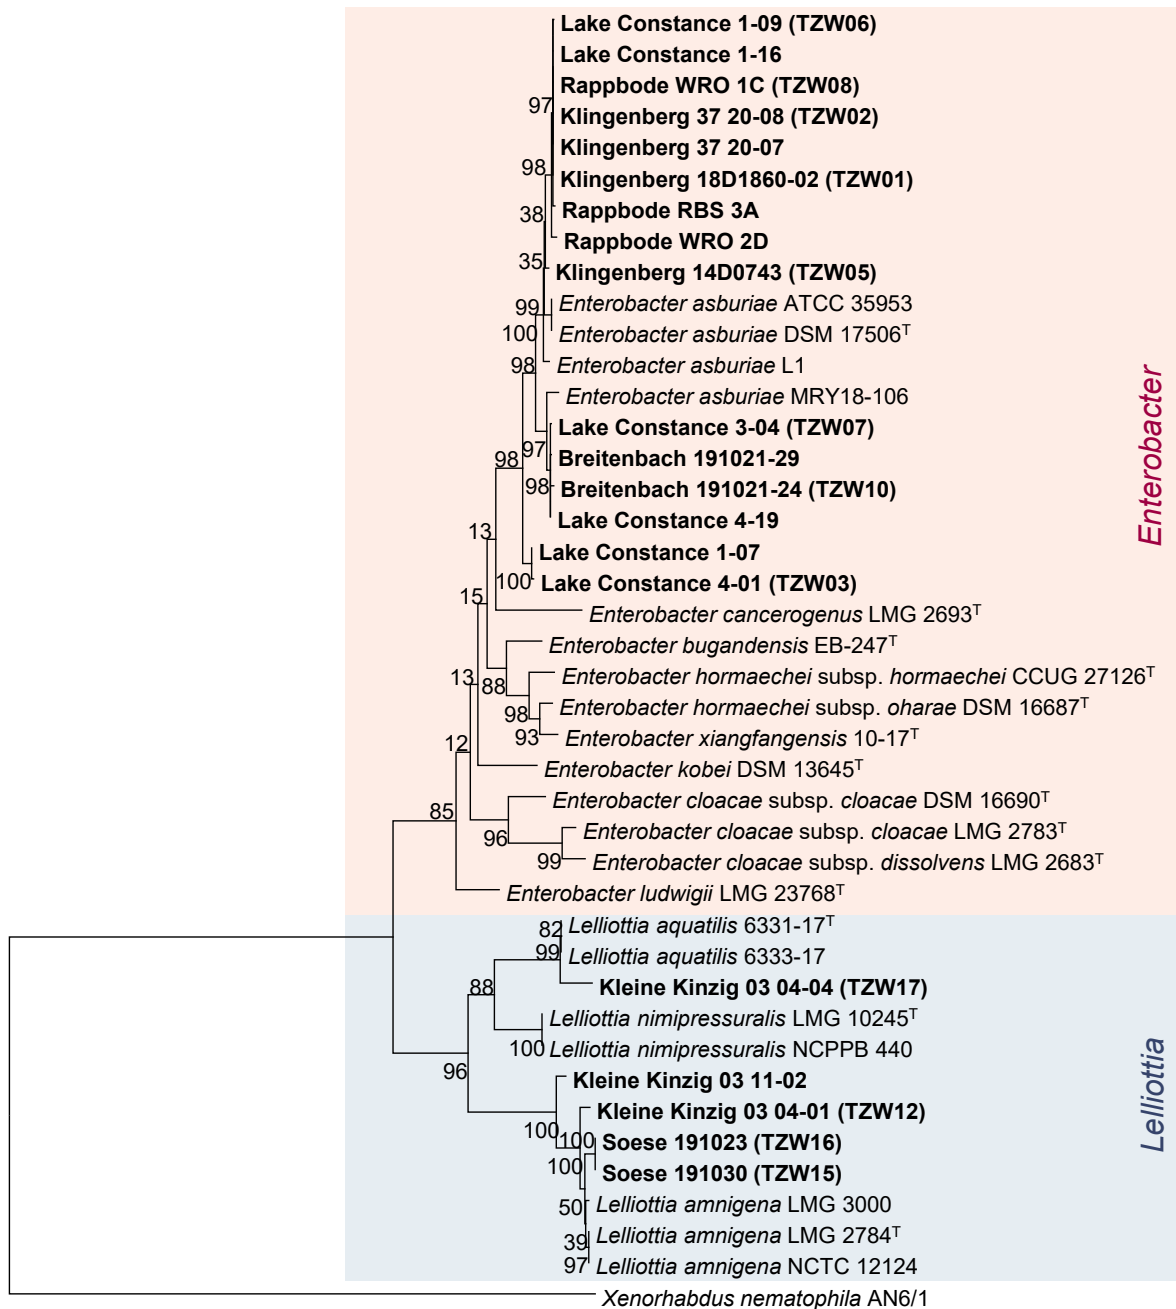

1065

1066 **Fig. 7:** Phylogenetic analysis of *Enterobacter* and *Lelliottia* spp. from different drinking water  
 1067 reservoirs and Lake Constance. Maximum likelihood tree based on the genes *atpD*, *gyrB*, *infB*  
 1068 and *rpoB* (MLSA-PCR) with 1000 bootstraps. As an outgroup *Xenorhabdus nematophila*  
 1069 AN6/1 was used. The reference bar represents a difference of the sequences of 5%.

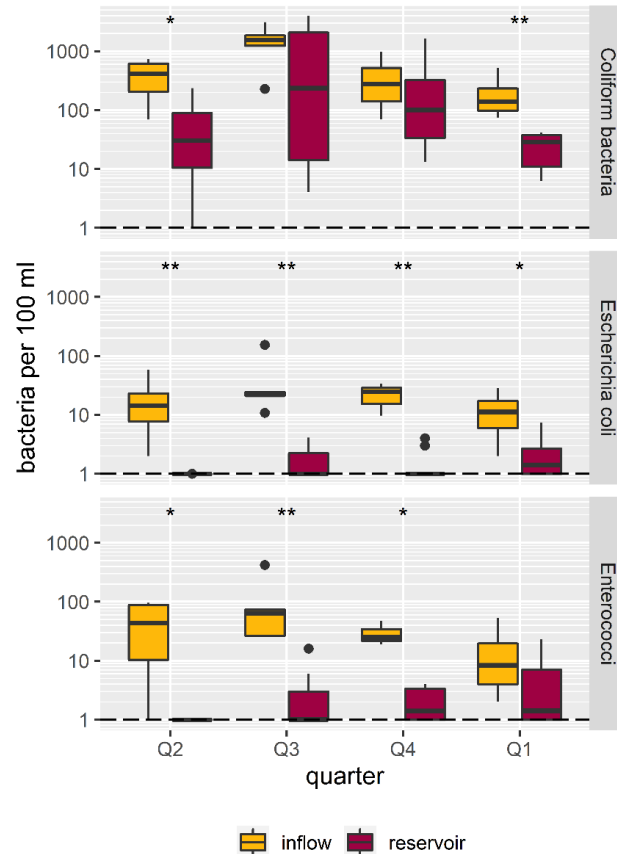

1070

1071 **Fig. 8:** Differences in coliform bacteria, Escherichia coli and enterococci in the Klingenberg

1072 Reservoir compared to its inflow. Q2: Apr – June 2018, Q3: July – Sep 2018, Q4: Oct – Dec

1073 2019, Q1: Jan – Mar 2019. Black line represents the detection limit of 1. For graphical

1074 illustration, values below detection limit (<1) were set to 0.99. For testing significant differences

1075 between the mean of inflow and reservoir samples the Mann-Whitney-U-test was performed

1076 (\*:  $p \leq 0.05$ , \*\*:  $p \leq 0.01$ ).

1077 **Tables**

1078

1079 **Table 1:** General description of the Klingenberg Reservoir and Kleine Kinzig Reservoir  
 1080 analyzed during this study.

|                           | <b>Klingenberg Reservoir (R1)</b>           | <b>Kleine Kinzig Reservoir (R2)</b> |
|---------------------------|---------------------------------------------|-------------------------------------|
| <b>State</b>              | Saxony                                      | Baden-Württemberg                   |
| <b>Location</b>           | Eastern Ore Mountains<br>(Erzgebirge)       | Black Forest                        |
| <b>River basin</b>        | Elbe                                        | Rhine                               |
| <b>Altitude</b>           | 390 m ASL                                   | 605 m ASL                           |
| <b>Ground level</b>       | 359.7 m ASL                                 | 544 m ASL                           |
| <b>Withdrawal points</b>  | 360.2 - 385 m ASL                           | 544 - 599.3 m ASL                   |
| <b>Raw water</b>          | 360.2 m ASL                                 | 564 - 564 m ASL                     |
| <b>Surface water</b>      | 385 m ASL                                   | 589.3 - 599.3 m ASL                 |
| <b>Depth (Average)</b>    | 15 m                                        | 22 m                                |
| <b>Depth (Maximum)</b>    | 33 m                                        | 65 m                                |
| <b>Water surface</b>      | 116 ha                                      | 56 ha                               |
| <b>Capacity</b>           | 16 Mio m <sup>3</sup>                       | 13 Mio m <sup>3</sup>               |
| <b>Raw water delivery</b> | 1000 l/s                                    | 200 l/s                             |
| <b>Retention time</b>     | 120 d                                       | 190 d                               |
| <b>Catchment area</b>     | 90 km <sup>2</sup> (forest and agriculture) | 18 km <sup>2</sup> (mainly forest)  |
| <b>Ecology</b>            | mesotrophic                                 | oligotrophic                        |
| <b>Geology</b>            | gneiss                                      | fretted sandstone                   |

1081

1082 **Table 2:** Meteorological and physicochemical parameters of the two reservoirs Klingenberg and Kleine Kinzig.

|                                                                     | Meteorological data    |                |                |                | Physicochemical data |                 |                  |                |                        |                |                |                 |                |                    |                    |                    |
|---------------------------------------------------------------------|------------------------|----------------|----------------|----------------|----------------------|-----------------|------------------|----------------|------------------------|----------------|----------------|-----------------|----------------|--------------------|--------------------|--------------------|
|                                                                     | PR<br>l/m <sup>3</sup> | WS<br>m/s      | AT<br>°C       | WT<br>°C       | PH                   | OXY<br>mg/l     | CON<br>µS/cm     | TUR<br>FNU     | SAK<br>m <sup>-1</sup> | CHL<br>µg/l    | TOC<br>mg/l    | NO<br>mg/l      | SI<br>mg/l     | TP<br>mg/l         | MN<br>mg/l         | FE<br>mg/l         |
| <b>Klingenberg Reservoir (R1)</b>                                   |                        |                |                |                |                      |                 |                  |                |                        |                |                |                 |                |                    |                    |                    |
| <b>2018</b>                                                         | <b>536.0</b>           | <b>1.0±0.5</b> | <b>9.2±8.2</b> | <b>9.2±5.0</b> | <b>7.2±0.3</b>       | <b>10.4±1.9</b> | <b>146.0±2.6</b> | <b>0.5±0.4</b> | <b>6.8±0.9</b>         | <b>3.5±2.0</b> | <b>3.5±0.2</b> | <b>13.1±2.5</b> | <b>7.0±0.5</b> | <b>0.025±0.005</b> | <b>0.015±0.023</b> | <b>0.010±0.004</b> |
| Surface                                                             | -                      | -              | -              | 11.4±6.4       | 7.5±0.2              | 10.7±1.5        | 145.7±2.4        | 0.5±0.2        | 6.6±1.0                | 4.6±1.7        | 3.6±0.3        | 12.8±2.4        | 6.8±0.5        | 0.026±0.007        | 0.009±0.009        | 0.010±0.004        |
| Raw                                                                 | -                      | -              | -              | 8.0±4.1        | 7.0±0.3              | 10.0±2.3        | 146.6±2.8        | 1.0±1.2        | 6.9±1.0                | 2.9±2.3        | 3.4±0.2        | 13.2±2.5        | 7.1±0.5        | 0.025±0.005        | 0.029±0.049        | 0.012±0.004        |
| <b>2019</b>                                                         | <b>690.4</b>           | <b>1.0±0.5</b> | <b>9.3±7.4</b> | <b>8.9±4.8</b> | <b>7.1±0.3</b>       | <b>10.9±2.2</b> | <b>157.8±7.9</b> | <b>1.0±0.4</b> | <b>6.7±0.5</b>         | <b>7.1±5.4</b> | <b>3.5±0.2</b> | <b>14.5±3.0</b> | <b>5.9±0.5</b> | <b>0.021±0.004</b> | <b>0.022±0.038</b> | <b>0.013±0.006</b> |
| Surface                                                             | -                      | -              | -              | 11.6±6.2       | 7.4±0.2              | 11.5±1.9        | 154.9±6.5        | 1.0±0.5        | 6.6±0.6                | 8.6±5.8        | 3.6±0.3        | 13.9±2.8        | 5.6±0.5        | 0.021±0.004        | 0.011±0.007        | 0.012±0.007        |
| Raw                                                                 | -                      | -              | -              | 7.5±3.5        | 6.9±0.3              | 10.0±2.6        | 161.2±7.7        | 1.2±0.6        | 6.8±0.5                | 6.2±5.0        | 3.5±0.2        | 15.0±3.1        | 6.2±0.4        | 0.023±0.004        | 0.060±0.107        | 0.015±0.007        |
| <b>Kleine Kinzig Reservoir (R2)</b>                                 |                        |                |                |                |                      |                 |                  |                |                        |                |                |                 |                |                    |                    |                    |
| <b>2018</b>                                                         | <b>1454.0</b>          | <b>2.5±0.7</b> | <b>9.7±7.8</b> | <b>6.6±3.7</b> | <b>6.8±0.3</b>       | <b>9.2±2.7</b>  | <b>40.6±3.2</b>  | <b>1.3±2.2</b> | <b>8.1±2.7</b>         | <b>6.7±2.1</b> | <b>2.2±0.2</b> | <b>1.5±0.5</b>  | <b>1.4±0.4</b> | <b>0.034±0.018</b> | <b>0.142±0.262</b> | <b>0.188±0.244</b> |
| Surface                                                             | -                      | -              | -              | 10.6±5.8       | 7.2±0.5              | 10.7±1.5        | 41.5±2.9         | 1.2±0.6        | 6.0±3.0                | 6.7±2.1        | 2.1±0.4        | 0.6±0.5         | 0.8±0.3        | -                  | 0.019±0.016        | 0.041±0.020        |
| Raw                                                                 | -                      | -              | -              | 4.9±0.6        | 6.6±0.1              | 9.2±2.2         | 39.2±1.9         | 1.2±2.3        | 8.6±1.8                | -              | 2.2±0.1        | 1.9±0.1         | 1.6±0.1        | 0.024±0.003        | 0.084±0.079        | 0.136±0.045        |
| <b>2019</b>                                                         | <b>1940.6</b>          | <b>2.4±0.7</b> | <b>9.2±7.1</b> | <b>6.7±3.2</b> | <b>6.7±0.3</b>       | <b>8.6±1.6</b>  | <b>39.8±4.2</b>  | <b>0.6±0.4</b> | <b>7.9±1.8</b>         | <b>5.0±4.8</b> | <b>2.4±0.2</b> | <b>1.5±0.4</b>  | <b>1.5±0.1</b> | <b>0.017±0.004</b> | <b>0.026±0.041</b> | <b>0.046±0.030</b> |
| Surface                                                             | -                      | -              | -              | 9.5±5.2        | 6.9±0.3              | 9.7±1.2         | 39.8±4.4         | 0.6±0.3        | 7.0±2.6                | 6.4±3.9        | 2.2±0.2        | 1.1±0.6         | 1.4±0.2        | -                  | 0.011±0.009        | 0.027±0.016        |
| Raw                                                                 | -                      | -              | -              | 5.4±1.2        | 6.7±0.2              | 8.4±1.4         | 39.6±4.3         | 0.5±0.4        | 8.4±1.3                | -              | 2.5±0.1        | 1.7±0.1         | 1.5±0.1        | 0.017±0.002        | 0.020±0.019        | 0.042±0.009        |
| <b>Differences between the two reservoirs (Mann-Whitney-U-test)</b> |                        |                |                |                |                      |                 |                  |                |                        |                |                |                 |                |                    |                    |                    |
| Surface                                                             | ***                    | ***            | NS             | NS             | ***                  | ***             | ***              | NS             | NS                     | NS             | ***            | ***             | ***            | -                  | **                 | ***                |
| Raw                                                                 | ***                    | ***            | NS             | ***            | ***                  | ***             | ***              | ***            | ***                    | -              | ***            | ***             | ***            | **                 | ***                | ***                |

Values show means and standard derivation, except for precipitation that shows sum of daily precipitation. PR = precipitation, WS = wind speed, AT = air temperature, WT = water temperature, pH = pH-value, OXY = oxygen, CON = conductivity at 25 °C, TUR = turbidity, SAK = SAK 254 nm, CHL = chlorophyll a, TOC = total organic carbon, NO = nitrate, SI = silicate, TP = total phosphate, MN = total manganese, FE = dissolved iron. Statistical significance is represented by \* (p < 0.05), \*\* (p < 0.01) and \*\*\* (p < 0.001). NS means no significance.

1084 **Table 3:** Mean values and standard deviation of total cell count (TCC), and gene copies of 16S rRNA genes and microbial source tracking markers  
 1085 genes (in 1 mL)

|                          |           | <b>Klingenberg Reservoir (R1)</b>     |                                       | <b>Kleine Kinzig Reservoir (R2)</b>   |                                       |
|--------------------------|-----------|---------------------------------------|---------------------------------------|---------------------------------------|---------------------------------------|
|                          |           | <b>low</b>                            | <b>high</b>                           | <b>low</b>                            | <b>high</b>                           |
| <b>number of samples</b> |           | 15                                    | 5                                     | 5                                     | 6                                     |
| <b>date</b>              |           | June 2018                             | September 2018                        | December 2019                         | July 2019                             |
| <b>TCC</b>               | counts/ml | $7.4 \times 10^5 \pm 6.1 \times 10^4$ | $8.2 \times 10^5 \pm 1.2 \times 10^5$ | $5.4 \times 10^5 \pm 1.1 \times 10^5$ | $5.7 \times 10^5 \pm 3.4 \times 10^5$ |
| <b>LNA</b>               | %         | 37.2%                                 | 31.8%                                 | 15.5%                                 | 12.9%                                 |
| <b>16S rRNA</b>          | GC/ml     | $1.3 \times 10^6 \pm 9.8 \times 10^4$ | $1.3 \times 10^6 \pm 1.5 \times 10^5$ | $6.3 \times 10^5 \pm 5.3 \times 10^4$ | $5.9 \times 10^5 \pm 1.7 \times 10^5$ |
| <b>unspecific</b>        | GC/ml     | $1.1 \times 10^2 \pm 5.2 \times 10^1$ | $2.0 \times 10^3 \pm 6.5 \times 10^2$ | $2.8 \times 10^3 \pm 3.6 \times 10^2$ | $3.8 \times 10^3 \pm 1.5 \times 10^3$ |
| <b>human-specific</b>    | GC/ml     | <LOQ                                  | <LOQ                                  | <LOQ                                  | <LOQ                                  |
| <b>ruminant-specific</b> | GC/ml     | <LOQ                                  | <LOQ                                  | <LOQ                                  | <LOQ                                  |
| <b>pig-specific</b>      | GC/ml     | <LOQ                                  | $4.0 \times 10^2^*$                   | <LOQ                                  | <LOQ                                  |

\* only measured in one sample, therefore no standard error

1086

1087 **Table 4:** Description of additional drinking water reservoirs and lakes with mass proliferation of coliform bacteria studied.

|                                           | <b>Lake Constance</b>         | <b>Rappbode Reservoir</b>                    | <b>Breitenbach Reservoir</b>          | <b>Söse Reservoir</b>      |
|-------------------------------------------|-------------------------------|----------------------------------------------|---------------------------------------|----------------------------|
| <b>Description of surface water</b>       |                               |                                              |                                       |                            |
| <b>State</b>                              | Germany, Austria, Switzerland | Saxony-Anhalt                                | North Rhine-Westphalia                | Lower Saxony               |
| <b>Location</b>                           | Foothills of the Alps         | Harz Mountains                               | Rothaargebirge                        | Harz Mountains             |
| <b>River basin</b>                        | Rhine                         | Elbe                                         | Rhine                                 | Weser                      |
| <b>Altitude</b>                           | 395 m ASL                     | 423 m ASL                                    | 370 m ASL                             | 326 m ASL                  |
| <b>Depth (Average)</b>                    | 90 m                          | 29 m                                         | 14 m                                  | 21 m                       |
| <b>Depth (Maximum)</b>                    | 251 m                         | 89 m                                         | 35 m                                  | 49 m                       |
| <b>Water surface</b>                      | 53,000 ha                     | 390 ha                                       | 58 ha                                 | 124 ha                     |
| <b>Capacity</b>                           | 48 Mrd m <sup>3</sup>         | 110 Mio m <sup>3</sup>                       | 8 Mio m <sup>3</sup>                  | 25 Mio m <sup>3</sup>      |
| <b>Raw water delivery</b>                 | 5500 l/s                      | 2900 l/s                                     | 190 l/s                               | 550 l/s                    |
| <b>Catchment area</b>                     | 11,500 km <sup>2</sup>        | 115 km <sup>2</sup><br>(mainly forest)       | 12 km <sup>2</sup><br>(mainly forest) | 49 km <sup>2</sup>         |
| <b>Ecology</b>                            | oligotrophic                  | mesotrophic                                  | oligo-/mesotrophic                    | oligotrophic               |
| <b>Geology</b>                            | moraines                      | granite                                      | shale, graywacke                      | shale, granite             |
| <b>Proliferation of coliform bacteria</b> |                               |                                              |                                       |                            |
| <b>Method</b>                             | Colilert                      | Colilert                                     | Colilert                              | CCA                        |
| <b>Concentration (Maximum)</b>            | >200 MPN/100 ml (R, S)        | >2420 MPN/100 ml (S)                         | 7940 MPN/100 ml (R)                   | >200 CFU/100 ml (R)        |
| <b>Date (Maximum)</b>                     | 27.08./16.09.2015 (R, S)      | 01./09.08.2018 (S)                           | 18.09.2019 (R)                        | 22.07.2019 (R)             |
| <b>Concentration (Sampling)</b>           | 172 MPN/100 ml (R)            | >2420 MPN/100 ml (S),<br>1986 MPN/100 ml (R) | 326 MPN/100 ml (R)                    | 264 CFU/100 ml (R)         |
| <b>Date (Sampling)</b>                    | 02.11.2015 (R)                | 09.08.2018 (S),<br>28.08.2018 (R)            | 21.10.2019 (R)                        | 30.10.2019 (R)             |
| <b>Identification (Sampling)</b>          | <i>Enterobacter asburiae</i>  | <i>Enterobacter asburiae</i>                 | <i>Enterobacter asburiae</i>          | <i>Lelliottia amnigena</i> |

S: Surface water; R: Raw water
